# Supplementary material for: M2-like macrophages dictate clinically relevant immunosuppression in metastatic ovarian cancer
Source: PubMed Central journal article supplement — J Immunother Cancer. 2020 Aug 20;8(2):e000979. doi: 10.1136/jitc-2020-000979 (PMC7443306; doi:10.1136/jitc-2020-000979), 2020-08-20
Supplement: jitc-2020-000979supp001.pdf [file jitc-2020-000979supp001.pdf]

## **Supplemental Material and Methods**

### **Library preparation and sequencing**

24 FFPE samples suitable for library preparation according to quality/quantity evaluations were processed following the manufacturer's specifications with minor modifications by using the Illumina TruSeq® RNA Access Library Prep (Illumina) along with purification steps employing SPRI beads. DV200 values for all samples exceeded 40%, and 100 ng of total RNA was used for the cDNA synthesis. Each library was quantified with the fluorimeter Qubit 2.0 (dsDNA HS kit; Thermo Fisher), and the size distribution was determined using a DNA 1000 kit on a 2100 Bioanalyzer instrument prior to pooling. All libraries had a similar size distribution of approximately 260 bp. A 4-plex pool of libraries was made by combining 200 ng of each DNA library. The libraries were sequenced on an Illumina NextSeq 500. At least 180 M pair-end 2x75 bp reads were generated per library. The libraries were prepared and sequenced at EMBL Genomics Core Facility (Heidelberg, Germany).

## Supplemental figures

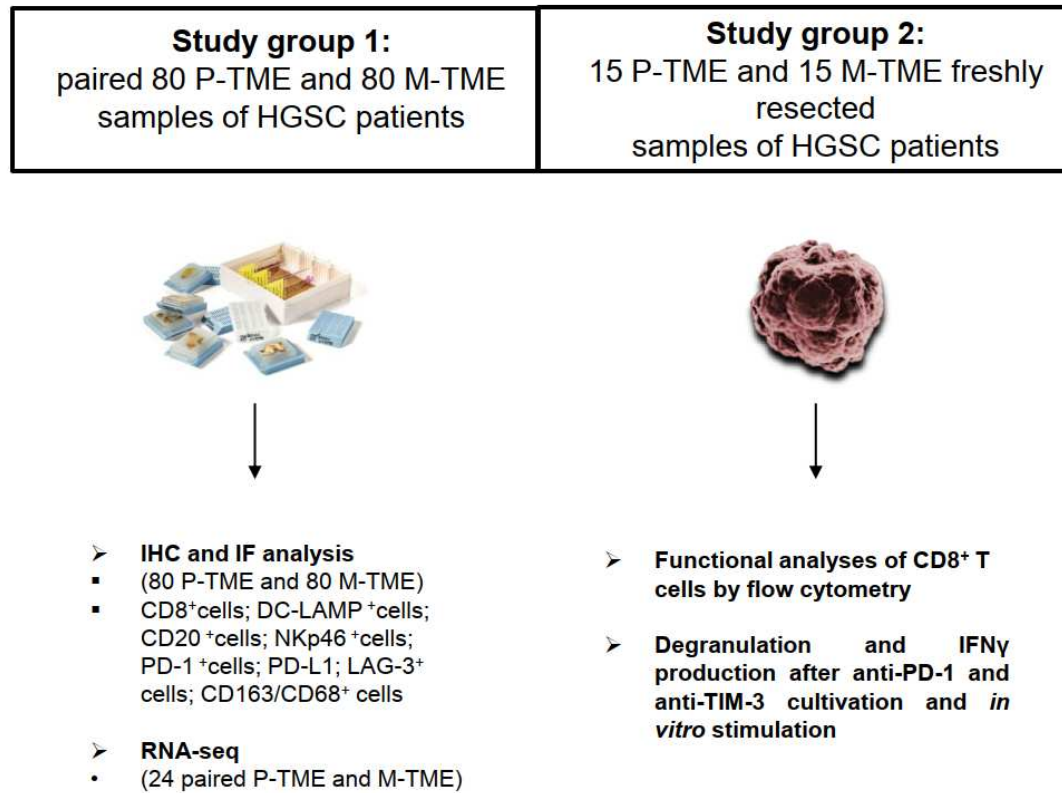

**Supplemental Figure 1. Experimental design of the study.**

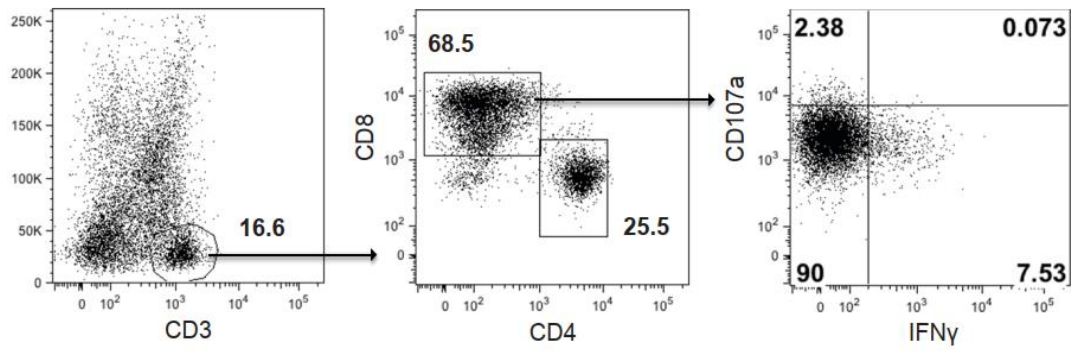

**Supplemental Figure 2: Gating strategy for CD8<sup>+</sup> T cells. The percentage of cells in each gate is reported.**

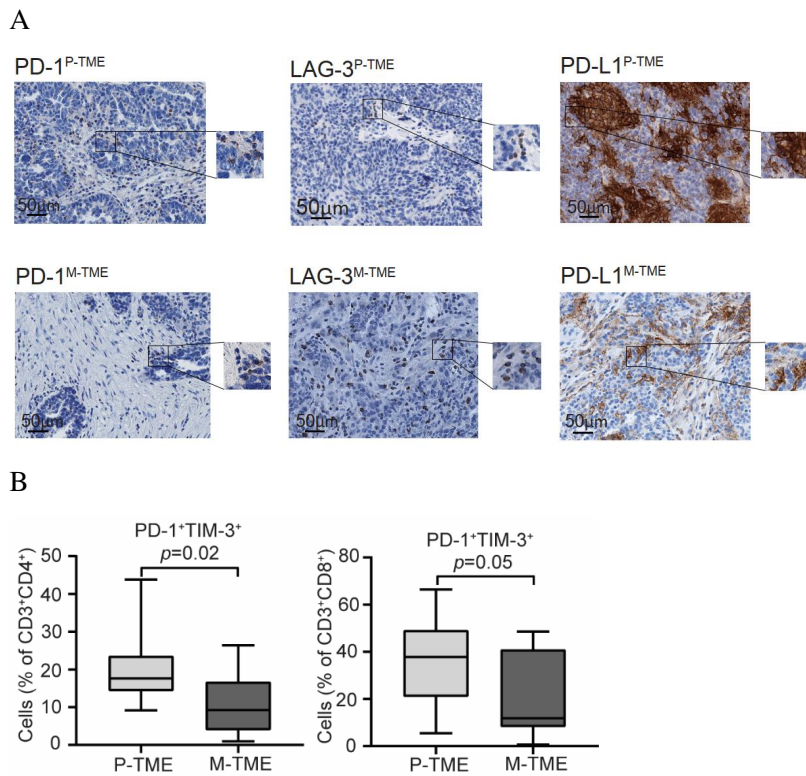

**Supplemental Figure 3: Distribution of major immune check-point molecules in P-TME and M-TME HGSCs.**

**(A)** Representative images of PD-1, LAG-3 and PD-L1 (scale bar = 50  $\mu$ m) immunostaining.

**(B)** Percentage of PD-1<sup>+</sup>TIM-3<sup>+</sup> cells among CD3<sup>+</sup>CD4<sup>+</sup> and CD3<sup>+</sup>CD8<sup>+</sup> T cells in P-TME and M-TME of HGSCs.

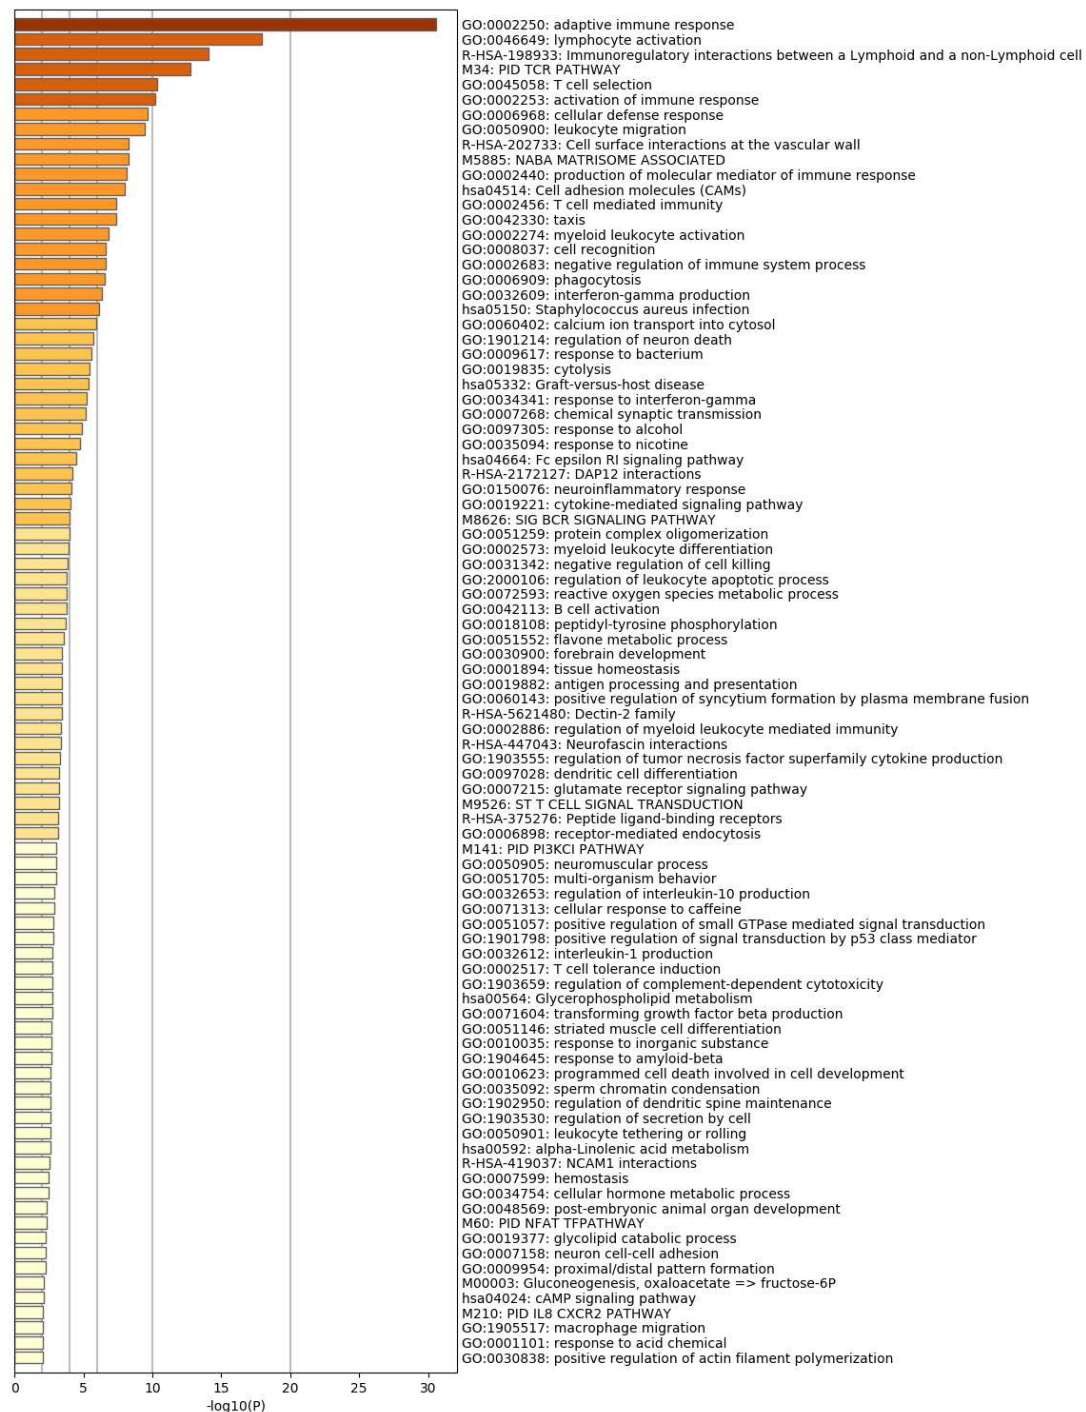

**Supplemental Figure 4: Bar plot of DEGs and DEGs associated pathways significantly upregulated in M2<sup>Lo</sup> M-TME samples, as determined by RNA-sequencing. Bar plot illustrates Spearman *p* values**

**A**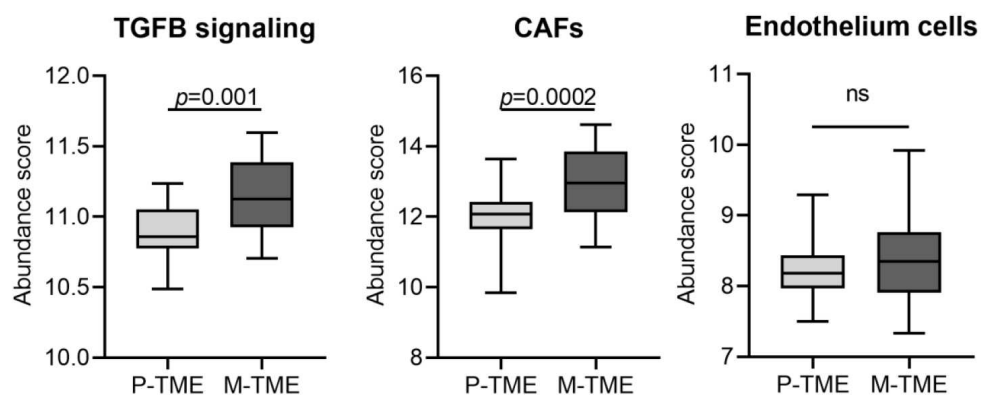**B**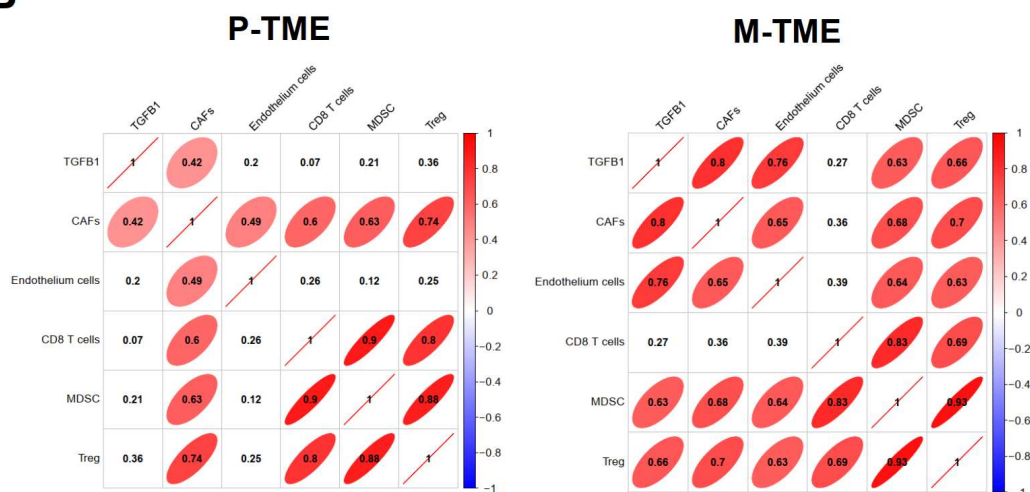

**Supplemental Figure 5. Prognostic impact of immunosuppressive signatures associated with TGFβ, cancer associated fibroblasts, myeloid derived suppressor cells and regulatory T cells in M-TME of HGSC.**

(A) Gene Ontology (Biological processes) enrichment analysis of differentially expressed in M-TME versus P-TME, as determined by metagenes on RNA-seq data from Study group 1. Box plots: lower quartile, median, upper quartile; whiskers, minimum, maximum.

(B) The correlation matrix for gene signature associated with TGFβ1, endothelium cells, CAFs, CD8<sup>+</sup> T cells, myeloid derived suppressor cells (MDSC) and regulatory T cells, as determined by metagenes on RNA-seq data from Study group 1. The correlation coefficient is displayed.

| Parameter      | Source | Producer                      | Clone     | Target Retrieval solution | Detection system                                                        | Revelation                                             | Dilution |
|----------------|--------|-------------------------------|-----------|---------------------------|-------------------------------------------------------------------------|--------------------------------------------------------|----------|
| <b>CD8</b>     | rabbit | Spring Bioscience             | SP16      | pH8                       | EnVision™+/HRP, Rabbit                                                  | DAB+ substrate Chromogen system                        | 1:80     |
| <b>CD20</b>    | mouse  | Dako                          | L26       | pH8                       | ImmPRESS-AP anti-mouse IgG (alkaline phosphatase) Polymer Detection Kit | ImmPACT™ Vector red Alkaline Phosphatase substrate kit | 1:250    |
| <b>CD68</b>    | mouse  | Abcam                         | KP1       | pH8                       | Poly-HRP-conjugated secondary antibody Goat anti-Mouse                  | Alexa Fluor™ 488 Tyramide Reagent                      | 1:60     |
| <b>CD163</b>   | rabbit | Abcam                         | EPR19518  | pH8                       | Poly-HRP-conjugated secondary antibody Goat anti-Rabbit                 | Alexa Fluor™ 647 Tyramide Reagent                      | 1:225    |
| <b>CTLA-4</b>  | mouse  | Santa Cruz Biotechnology, Inc | F-8       | pH9                       | EnVision™+/HRP, Mouse                                                   | DAB+ substrate Chromogen system                        | 1:200    |
| <b>DC-LAMP</b> | rat    | Dendritics                    | 1010E1.01 | pH8                       | donkey anti-rat IgG-biot (Jackson ImmunoResearch)                       | DAB+ substrate Chromogen system                        | 1:80     |
| <b>LAG-3</b>   | mouse  | Novus Biologicals             | 17B4      | pH9                       | Impress HRP anti-mouse IgG (Peroxidase) Polymer                         | DAB+ substrate Chromogen system                        | 1:150    |
| <b>NKp46</b>   | mouse  | RD systems                    | 195314    | pH8                       | Impress HRP anti-mouse IgG (Peroxidase) Polymer                         | DAB+ substrate Chromogen system                        | 1:100    |
| <b>PD-1</b>    | mouse  | Abcam                         | NAT105    | pH9                       | Impress HRP anti-mouse IgG (Peroxidase) Polymer                         | DAB+ substrate Chromogen system                        | 1:50     |
| <b>PD-L1</b>   | rabbit | Ventana                       | SP142     | pH6                       | Impress HRP anti-rabbit IgG (Peroxidase) Polymer                        | DAB+ substrate Chromogen system                        | 1:50     |

**Supplemental Table1. The list of antibodies used for IHC and immunofluorescence staining respectively.**

| <b>Parameter</b>              | <b>Source</b> | <b>Producer</b> | <b>Clone</b> | <b>Fluorochrome</b> | <b>Dilution</b> |
|-------------------------------|---------------|-----------------|--------------|---------------------|-----------------|
| <b>CD3</b>                    | mouse         | EXBIO           | MEM-57       | Alexa 700           | 5:100           |
| <b>CD4</b>                    | mouse         | Beckman Coulter | SFCI12T4D11  | ECD                 | 5:100           |
| <b>CD8</b>                    | mouse         | BD Biosciences  | RPA-T8       | HV500               | 5:100           |
| <b>CD107a</b>                 | mouse         | BioLegend       | H4A3         | FITC                | 8:100           |
| <b>Granzyme</b>               | mouse         | BD Biosciences  | GB11         | BV421               | 4:100           |
| <b>IFN<math>\gamma</math></b> | murine        | eBioscience     | 4S.B3        | PE-Cy7              | 1:100           |
| <b>Perforin</b>               | mouse         | BioLegend       | dG9          | APC                 | 4:100           |

***Supplemental Table 2. The list of antibodies used for flow cytometry.***



| Gene symbol | Cluster   | FC (log2) | adj. p-value |
|-------------|-----------|-----------|--------------|
| ABCG2       | cluster 1 | 1,79      | 0,00016      |
| ABCG5       | cluster 1 | 1         | 0,01346      |
| ABO         | cluster 1 | 1,35      | 0,00125      |
| AC002472.13 | cluster 1 | 2,5       | 0,00044      |
| AC005481.5  | cluster 1 | 1,93      | 0,00855      |
| AC007563.4  | cluster 1 | 1,42      | 0,04553      |
| AC009967.3  | cluster 1 | 1,87      | 0,02455      |
| AC010136.2  | cluster 1 | 1,32      | 0,02351      |
| AC016251.1  | cluster 1 | 1,92      | 0,00306      |
| AC016582.2  | cluster 1 | 1,31      | 0,00606      |
| AC019129.2  | cluster 1 | 2,34      | 0,00574      |
| AC026150.5  | cluster 1 | 1,98      | 0,0055       |
| AC069213.1  | cluster 1 | 1,12      | 0,01797      |
| AC078899.3  | cluster 1 | 1,82      | 0,02475      |
| AC078899.4  | cluster 1 | 2,23      | 0,02022      |
| AC090954.1  | cluster 1 | 1,73      | 0,01553      |
| AC091801.1  | cluster 1 | 2,36      | 0,00482      |
| AC092155.1  | cluster 1 | 1,34      | 0,0056       |
| AC093142.2  | cluster 1 | 1,36      | 0,03372      |
| AC112693.2  | cluster 1 | 2,73      | 0,00493      |
| AC131025.8  | cluster 1 | 1,46      | 0,00783      |
| AC136604.1  | cluster 1 | 1,65      | 0,03737      |
| ACADL       | cluster 1 | 1,52      | 0,03053      |
| ACCSL       | cluster 1 | 1,88      | 0,03215      |
| ACE2        | cluster 1 | 1,47      | 0,00374      |
| ACSM1       | cluster 1 | 2,44      | 8,68E-07     |
| ACSM3       | cluster 1 | 1,59      | 4,19E-06     |
| ACTR3BP4    | cluster 1 | 1,21      | 0,03264      |
| ADAM2       | cluster 1 | 5,1       | 0,00017      |
| ADAM23      | cluster 1 | 1,1       | 0,04057      |
| ADAMTS19    | cluster 1 | 1,39      | 0,02877      |
| ADAMTS8     | cluster 1 | 1,1       | 0,0357       |
| ADCY2       | cluster 1 | 1,98      | 0,00057      |
| ADGB        | cluster 1 | 2,84      | 1,06E-06     |
| ADRB3       | cluster 1 | 4,24      | 2,64E-06     |
| AFP         | cluster 1 | 2,21      | 0,02463      |
| AK7         | cluster 1 | 1,21      | 0,01291      |
| AL078585.1  | cluster 1 | 1,6       | 0,0025       |
| AL645730.2  | cluster 1 | 1,81      | 0,00856      |
| ALLC        | cluster 1 | 3,94      | 1,91E-06     |
| ALMS1P      | cluster 1 | 1,07      | 0,00131      |

|             |           |       |          |
|-------------|-----------|-------|----------|
| ALX1        | cluster 1 | 2,55  | 0,0011   |
| AMER2       | cluster 1 | 3,85  | 0,00624  |
| AMHR2       | cluster 1 | 4,15  | 9,30E-09 |
| AMY1B       | cluster 1 | 2,38  | 0,01145  |
| ANGPTL5     | cluster 1 | 4,37  | 1,98E-06 |
| ANKRD30BL   | cluster 1 | 1,88  | 0,03117  |
| ANKRD66     | cluster 1 | 3,31  | 0,01811  |
| ANKS4B      | cluster 1 | 2,32  | 0,03845  |
| ANO4        | cluster 1 | 1,83  | 0,00078  |
| ANP32D      | cluster 1 | 1,52  | 0,01873  |
| AP000322.53 | cluster 1 | 1,24  | 0,04643  |
| APOF        | cluster 1 | 1,71  | 0,00654  |
| AQP4        | cluster 1 | 2,22  | 0,01186  |
| ARMC3       | cluster 1 | 1,37  | 0,01833  |
| ARMS2       | cluster 1 | 2,25  | 0,00206  |
| ARX         | cluster 1 | 6,76  | 1,58E-07 |
| ASTN1       | cluster 1 | 1,76  | 0,00715  |
| ASXL3       | cluster 1 | 1,63  | 0,00922  |
| ATRNL1      | cluster 1 | 2,73  | 1,60E-05 |
| BAMBI       | cluster 1 | 1,92  | 0,00017  |
| BIRC8       | cluster 1 | 12,82 | 0,00075  |
| BMP5        | cluster 1 | 1,96  | 0,04907  |
| BPI         | cluster 1 | 1,81  | 0,00565  |
| BPIFC       | cluster 1 | 2,36  | 0,00815  |
| BRAFP1      | cluster 1 | 1,38  | 0,00038  |
| BRS3        | cluster 1 | 2,27  | 0,00028  |
| BTNL2       | cluster 1 | 1,25  | 0,04405  |
| C10orf115   | cluster 1 | 1,95  | 0,04334  |
| C11orf16    | cluster 1 | 1,28  | 0,0067   |
| C11orf88    | cluster 1 | 1,5   | 0,02127  |
| C14orf39    | cluster 1 | 1,96  | 0,02619  |
| C15orf26    | cluster 1 | 1,14  | 0,02297  |
| C15orf59    | cluster 1 | 1,21  | 0,01849  |
| C1orf141    | cluster 1 | 3,47  | 8,85E-05 |
| C1orf158    | cluster 1 | 2,25  | 0,0125   |
| C1orf173    | cluster 1 | 2,62  | 1,22E-05 |
| C1orf194    | cluster 1 | 1,11  | 0,02157  |
| C1orf222    | cluster 1 | 2,44  | 0,00039  |
| C1orf234    | cluster 1 | 1,25  | 0,02879  |
| C1orf87     | cluster 1 | 3,26  | 1,19E-05 |
| C20orf26    | cluster 1 | 1,21  | 0,0473   |
| C20orf85    | cluster 1 | 2,57  | 0,00742  |
| C21orf62    | cluster 1 | 1,6   | 7,03E-06 |
| C21orf88    | cluster 1 | 1,87  | 0,01288  |
| C22orf31    | cluster 1 | 1,9   | 0,00285  |

|          |           |      |          |
|----------|-----------|------|----------|
| C2orf71  | cluster 1 | 3,38 | 1,23E-09 |
| C2orf73  | cluster 1 | 1,9  | 4,40E-05 |
| C3orf72  | cluster 1 | 6    | 2,62E-23 |
| C3orf84  | cluster 1 | 1,28 | 0,04378  |
| C4BPB    | cluster 1 | 3,58 | 9,07E-10 |
| C4orf22  | cluster 1 | 1,85 | 0,01499  |
| C7orf57  | cluster 1 | 1,98 | 0,00194  |
| C8orf46  | cluster 1 | 1,19 | 0,03752  |
| C8orf49  | cluster 1 | 6,13 | 3,10E-11 |
| C9orf135 | cluster 1 | 2    | 0,00531  |
| C9orf147 | cluster 1 | 1,16 | 0,00214  |
| C9orf171 | cluster 1 | 2,1  | 0,00351  |
| C9orf24  | cluster 1 | 1,47 | 0,00086  |
| CA10     | cluster 1 | 3,75 | 0,00046  |
| CA11     | cluster 1 | 1,11 | 0,00037  |
| CA7      | cluster 1 | 1,71 | 0,00046  |
| CABYRP1  | cluster 1 | 1,41 | 0,03845  |
| CACNA1H  | cluster 1 | 1,55 | 0,00497  |
| CADPS    | cluster 1 | 1,99 | 0,00096  |
| CAMK1G   | cluster 1 | 2,07 | 0,00124  |
| CAPSL    | cluster 1 | 2,04 | 0,01037  |
| CASC1    | cluster 1 | 1,41 | 0,00047  |
| CASP12   | cluster 1 | 2,29 | 0,00026  |
| CASR     | cluster 1 | 2,95 | 0,0011   |
| CCBE1    | cluster 1 | 1,52 | 0,03243  |
| CCDC11   | cluster 1 | 1,1  | 0,00922  |
| CCDC114  | cluster 1 | 1,14 | 0,04464  |
| CCDC135  | cluster 1 | 1,71 | 0,01487  |
| CCDC170  | cluster 1 | 1,09 | 0,00412  |
| CCDC178  | cluster 1 | 3,34 | 1,20E-09 |
| CCDC19   | cluster 1 | 1,22 | 0,0054   |
| CCDC27   | cluster 1 | 1,14 | 0,02612  |
| CCDC37   | cluster 1 | 1,01 | 0,01978  |
| CCDC60   | cluster 1 | 1,18 | 0,03087  |
| CCDC68   | cluster 1 | 1,53 | 0,0009   |
| CD22     | cluster 1 | 1,29 | 0,01704  |
| CDC42P3  | cluster 1 | 1,33 | 0,00696  |
| CDH10    | cluster 1 | 2,56 | 0,01165  |
| CDH4     | cluster 1 | 1,74 | 0,00211  |
| CDH7     | cluster 1 | 3,48 | 0,00174  |
| CDHR1    | cluster 1 | 2,29 | 2,54E-05 |
| CDHR3    | cluster 1 | 1,54 | 0,00246  |
| CDHR4    | cluster 1 | 2,28 | 5,41E-05 |
| CECR2    | cluster 1 | 1,29 | 0,0391   |
| CELF4    | cluster 1 | 1,08 | 0,02271  |

|                |           |      |          |
|----------------|-----------|------|----------|
| CELF5          | cluster 1 | 1,83 | 0,00892  |
| CES5AP1        | cluster 1 | 2,03 | 0,00222  |
| CIR1P2         | cluster 1 | 1,25 | 0,04753  |
| CLEC4M         | cluster 1 | 3,09 | 0,00024  |
| CLRN1          | cluster 1 | 1,51 | 0,01338  |
| CLSTN2         | cluster 1 | 1,35 | 0,01234  |
| CMYA5          | cluster 1 | 1,58 | 0,00023  |
| CNGA4          | cluster 1 | 1,25 | 0,02925  |
| CNGB3          | cluster 1 | 1,84 | 0,00116  |
| CNNM1          | cluster 1 | 1,74 | 0,00225  |
| CNTNAP2        | cluster 1 | 3,15 | 2,64E-06 |
| COLCA1         | cluster 1 | 1,63 | 0,00132  |
| COLCA2         | cluster 1 | 1,1  | 0,01173  |
| COLEC11        | cluster 1 | 3,55 | 3,98E-14 |
| CPED1          | cluster 1 | 1,14 | 0,0473   |
| CRB1           | cluster 1 | 1,9  | 0,00044  |
| CRISP2         | cluster 1 | 2,74 | 0,00147  |
| CRYGD          | cluster 1 | 3,4  | 0,00243  |
| CSDC2          | cluster 1 | 1,65 | 0,0011   |
| CSPG4P9        | cluster 1 | 1,49 | 0,04616  |
| CTA-299D3.8    | cluster 1 | 1,68 | 0,00764  |
| CTC-451A6.4    | cluster 1 | 1,42 | 0,04698  |
| CTD-2021H9.3   | cluster 1 | 1,51 | 0,00372  |
| CTD-2260A17.2  | cluster 1 | 1,22 | 0,01602  |
| CTD-2290C23.1  | cluster 1 | 1,32 | 0,00243  |
| CTD-2311M21.2  | cluster 1 | 2,18 | 8,36E-06 |
| CTD-2325A15.3  | cluster 1 | 2,04 | 0,01755  |
| CTD-2542C24.2  | cluster 1 | 2,91 | 2,86E-05 |
| CTD-3193O13.10 | cluster 1 | 1,58 | 0,03895  |
| CTD-3233P19.8  | cluster 1 | 1,79 | 0,01421  |
| CTH            | cluster 1 | 1,07 | 0,00357  |
| CTNNA3         | cluster 1 | 1,13 | 0,0357   |
| CYP11A1        | cluster 1 | 2,01 | 4,40E-05 |
| CYP17A1        | cluster 1 | 1,66 | 0,00016  |
| DCAF13P1       | cluster 1 | 2,34 | 0,0291   |
| DCDC2C         | cluster 1 | 2,41 | 0,04062  |
| DDC            | cluster 1 | 1,45 | 0,02241  |
| DES            | cluster 1 | 2,13 | 0,00027  |
| DGKB           | cluster 1 | 1,58 | 0,03309  |
| DHRS2          | cluster 1 | 4,14 | 2,37E-07 |
| DIRAS3         | cluster 1 | 2,17 | 8,66E-06 |
| DLK1           | cluster 1 | 7,13 | 2,05E-11 |
| DNAAF1         | cluster 1 | 1,88 | 0,00063  |
| DNAH11         | cluster 1 | 1,13 | 0,02236  |
| DNAH12         | cluster 1 | 1,96 | 0,00051  |

|           |           |      |          |
|-----------|-----------|------|----------|
| DNAH3     | cluster 1 | 1,55 | 0,00581  |
| DNAH9     | cluster 1 | 1,82 | 0,00142  |
| DNAI1     | cluster 1 | 1,33 | 0,02693  |
| DNAI2     | cluster 1 | 2,08 | 0,01098  |
| DPF3      | cluster 1 | 1,94 | 0,00031  |
| DRC1      | cluster 1 | 2,02 | 0,00038  |
| DSCAML1   | cluster 1 | 1,37 | 0,00016  |
| DUSP26    | cluster 1 | 2,47 | 0,00072  |
| DYNLRB2   | cluster 1 | 1,22 | 0,01978  |
| DYTN      | cluster 1 | 2,48 | 0,00856  |
| ECEL1     | cluster 1 | 3,43 | 4,30E-07 |
| EDDM3A    | cluster 1 | 1,8  | 0,01041  |
| EFCAB1    | cluster 1 | 2,1  | 7,67E-05 |
| EFCC1     | cluster 1 | 1,35 | 0,00674  |
| EFHB      | cluster 1 | 1,32 | 0,00844  |
| EFHC2     | cluster 1 | 1,14 | 0,00646  |
| EIF4A1P10 | cluster 1 | 1,79 | 0,00299  |
| EML5      | cluster 1 | 2,14 | 4,19E-07 |
| EN2       | cluster 1 | 2,92 | 0,00404  |
| ENKUR     | cluster 1 | 1,49 | 0,00169  |
| ENPP3     | cluster 1 | 1,26 | 0,01291  |
| ENPP6     | cluster 1 | 4,47 | 1,18E-11 |
| EPHA5     | cluster 1 | 2,91 | 3,35E-06 |
| EPHA6     | cluster 1 | 1,17 | 0,03459  |
| EPHA7     | cluster 1 | 2,03 | 0,00511  |
| EPS8L3    | cluster 1 | 2,81 | 2,11E-05 |
| ERC2      | cluster 1 | 1,05 | 0,03134  |
| ERICH2    | cluster 1 | 1,14 | 0,01207  |
| ESR2      | cluster 1 | 1,89 | 2,65E-06 |
| FABP5P3   | cluster 1 | 1,34 | 0,04154  |
| FAM150B   | cluster 1 | 1,82 | 0,00016  |
| FAM153B   | cluster 1 | 1,48 | 0,00884  |
| FAM183A   | cluster 1 | 1,31 | 0,01867  |
| FAM189A2  | cluster 1 | 1,66 | 3,16E-05 |
| FAM220CP  | cluster 1 | 1,4  | 0,01954  |
| FAM60CP   | cluster 1 | 1,8  | 0,03869  |
| FAM81B    | cluster 1 | 1,69 | 0,00216  |
| FAM90A24P | cluster 1 | 1,89 | 0,0209   |
| FFAR1     | cluster 1 | 1,55 | 0,0427   |
| FGF17     | cluster 1 | 1,78 | 0,03864  |
| FGF22     | cluster 1 | 1,61 | 0,01186  |
| FGG       | cluster 1 | 3,6  | 0,00771  |
| FHL2      | cluster 1 | 1,17 | 0,00601  |
| FOXL2     | cluster 1 | 6,04 | 1,43E-21 |
| FREM2     | cluster 1 | 2,24 | 0,00179  |

|              |           |      |          |
|--------------|-----------|------|----------|
| FRMPD3       | cluster 1 | 1,36 | 0,00946  |
| FRRS1L       | cluster 1 | 2,59 | 1,14E-07 |
| FSHR         | cluster 1 | 2,62 | 3,22E-05 |
| FXYD2        | cluster 1 | 1,74 | 0,00152  |
| FXYD6        | cluster 1 | 1,15 | 0,0018   |
| G6PC2        | cluster 1 | 3,15 | 6,82E-05 |
| GABRA5       | cluster 1 | 1,89 | 0,03009  |
| GABRG1       | cluster 1 | 3,49 | 6,81E-07 |
| GALNTL5      | cluster 1 | 2,94 | 0,02258  |
| GATA4        | cluster 1 | 5,58 | 3,10E-11 |
| GATM         | cluster 1 | 2,05 | 9,91E-06 |
| GCKR         | cluster 1 | 1,6  | 0,00722  |
| GDNF         | cluster 1 | 1,92 | 0,00032  |
| GDNF-AS1     | cluster 1 | 2,23 | 0,00989  |
| GDPD2        | cluster 1 | 1,32 | 0,04428  |
| GIF          | cluster 1 | 1,02 | 0,00125  |
| GJC3         | cluster 1 | 1,02 | 0,04488  |
| GLIPR1L2     | cluster 1 | 1,15 | 0,02156  |
| GLRA4        | cluster 1 | 2,27 | 0,00646  |
| GNG4         | cluster 1 | 2,05 | 0,00075  |
| GOT1L1       | cluster 1 | 5,16 | 8,92E-10 |
| GPM6A        | cluster 1 | 1,97 | 0,00182  |
| GPR112       | cluster 1 | 3,79 | 2,68E-05 |
| GPR128       | cluster 1 | 3,09 | 0,00244  |
| GRAMD1B      | cluster 1 | 1,11 | 0,00051  |
| GRB14        | cluster 1 | 1,2  | 0,01319  |
| GREB1        | cluster 1 | 2,48 | 1,19E-07 |
| GRID2        | cluster 1 | 1,89 | 0,00372  |
| GRIK4        | cluster 1 | 1,25 | 0,03845  |
| GRM8         | cluster 1 | 2,45 | 5,47E-05 |
| GS1-184P14.2 | cluster 1 | 2,25 | 0,04897  |
| GSTA1        | cluster 1 | 3,95 | 1,89E-08 |
| GSTA3        | cluster 1 | 3,41 | 1,70E-06 |
| GSTA5        | cluster 1 | 3,73 | 0,00451  |
| GSTM5        | cluster 1 | 2,58 | 3,92E-05 |
| GUCY2F       | cluster 1 | 1,85 | 0,02923  |
| H1FNT        | cluster 1 | 2,31 | 0,00192  |
| HFM1         | cluster 1 | 1,26 | 0,00837  |
| HLF          | cluster 1 | 1,93 | 0,00094  |
| HMGB3P1      | cluster 1 | 1,82 | 0,04725  |
| HMGCS2       | cluster 1 | 2,66 | 0,00266  |
| HMG2P40      | cluster 1 | 2,29 | 0,00541  |
| HMG2P41      | cluster 1 | 3,07 | 0,031    |
| HMG2P9       | cluster 1 | 1,53 | 0,00564  |
| HNRNPA1P4    | cluster 1 | 1,79 | 0,006    |

|              |           |       |          |
|--------------|-----------|-------|----------|
| HNRNPA1P42   | cluster 1 | 2,32  | 0,00479  |
| HNRNPA1P44   | cluster 1 | 1,5   | 0,01133  |
| HNRNPA1P51   | cluster 1 | 2,45  | 0,04585  |
| HNRNPA3P13   | cluster 1 | 2,44  | 0,01168  |
| HNRNPA3P14   | cluster 1 | 2,82  | 0,00936  |
| HOXC6        | cluster 1 | 1,26  | 0,01987  |
| HRASLS2      | cluster 1 | 1,38  | 0,04014  |
| HS3ST1       | cluster 1 | 1,58  | 5,19E-05 |
| HS6ST2       | cluster 1 | 2,04  | 0,00254  |
| HTR1A        | cluster 1 | 2,98  | 0,01291  |
| HTR1E        | cluster 1 | 4,02  | 8,90E-06 |
| HTR3B        | cluster 1 | 3,02  | 0,00617  |
| HTR5A-AS1    | cluster 1 | 9     | 0,032    |
| CHGB         | cluster 1 | 2,44  | 0,00076  |
| CHRFAM7A     | cluster 1 | 1,3   | 0,02667  |
| IFLTD1       | cluster 1 | 2,06  | 0,0138   |
| IGFBP1       | cluster 1 | 2,29  | 0,00428  |
| IGFBP5       | cluster 1 | 1,19  | 0,00207  |
| IGSF10       | cluster 1 | 1,26  | 0,01545  |
| IGSF11       | cluster 1 | 1,71  | 0,00095  |
| IGSF5        | cluster 1 | 1,93  | 0,00077  |
| IL1RAPL2     | cluster 1 | 1,49  | 0,02713  |
| INHA         | cluster 1 | 2,5   | 1,40E-06 |
| INTS4L2      | cluster 1 | 1,04  | 0,04768  |
| IQUB         | cluster 1 | 1,23  | 0,00113  |
| IRS4         | cluster 1 | 2,99  | 0,00037  |
| JAKMIP3      | cluster 1 | 1,29  | 0,00588  |
| JPH4         | cluster 1 | 1,62  | 0,01838  |
| KCNE1        | cluster 1 | 1,74  | 0,03989  |
| KCNT1        | cluster 1 | 1,26  | 0,01873  |
| KIAA1257     | cluster 1 | 1,03  | 0,00843  |
| KIAA1324     | cluster 1 | 1,69  | 0,00396  |
| KLHDC8A      | cluster 1 | 4,3   | 5,72E-17 |
| KLHL33       | cluster 1 | 1,39  | 0,03746  |
| KNDC1        | cluster 1 | 1,76  | 0,00862  |
| KRT18P11     | cluster 1 | 3,22  | 0,00142  |
| KRT8P13      | cluster 1 | 1,82  | 0,023    |
| KRT8P40      | cluster 1 | 1,43  | 0,03255  |
| KRT8P42      | cluster 1 | 3,31  | 0,00023  |
| KRTAP24-1    | cluster 1 | 26,04 | 2,24E-15 |
| KRTAP9-7     | cluster 1 | 13,2  | 0,00047  |
| LA16c-3G11.7 | cluster 1 | 3,25  | 0,01698  |
| LAMA2        | cluster 1 | 1,11  | 0,03459  |
| LCN1P1       | cluster 1 | 2,33  | 0,02044  |
| LDHAP7       | cluster 1 | 1,32  | 0,00046  |

|            |           |      |          |
|------------|-----------|------|----------|
| LEFTY2     | cluster 1 | 2,32 | 0,00116  |
| LHCGR      | cluster 1 | 1,24 | 0,03125  |
| LHX9       | cluster 1 | 2,31 | 0,0018   |
| LINC00092  | cluster 1 | 1,44 | 0,03541  |
| LINC00473  | cluster 1 | 3,31 | 0,0001   |
| LONRF2     | cluster 1 | 1,07 | 0,00106  |
| LRFN2      | cluster 1 | 2,76 | 0,00045  |
| LRRC37A12P | cluster 1 | 1,65 | 0,02114  |
| LRRC3B     | cluster 1 | 2,58 | 0,00035  |
| LRRC3C     | cluster 1 | 2,4  | 0,03694  |
| LRRC71     | cluster 1 | 1,12 | 0,01158  |
| LRRC9      | cluster 1 | 1,02 | 0,00815  |
| LRRTM3     | cluster 1 | 2,01 | 0,00017  |
| LYNX1      | cluster 1 | 1,07 | 0,03585  |
| MAG        | cluster 1 | 1,73 | 0,0178   |
| MAGEC1     | cluster 1 | 2,24 | 0,04844  |
| MAGEE2     | cluster 1 | 1,74 | 0,00033  |
| MAMDC2     | cluster 1 | 1,16 | 0,00067  |
| MAOB       | cluster 1 | 1,26 | 0,01288  |
| MAP3K19    | cluster 1 | 1,4  | 0,00261  |
| MAPK4      | cluster 1 | 1,73 | 0,01064  |
| MASP1      | cluster 1 | 2,08 | 0,00023  |
| MCF2       | cluster 1 | 3,22 | 9,56E-08 |
| MCHR1      | cluster 1 | 1,67 | 0,01671  |
| MIR1266    | cluster 1 | 1,52 | 0,03995  |
| MIR145     | cluster 1 | 1,42 | 0,0051   |
| MIR202HG   | cluster 1 | 6,23 | 6,07E-09 |
| MIR32      | cluster 1 | 1,35 | 0,00045  |
| MIR381     | cluster 1 | 1,8  | 0,02716  |
| MIR514A1   | cluster 1 | 4,68 | 0,02581  |
| MIR532     | cluster 1 | 2,17 | 0,04054  |
| MIR561     | cluster 1 | 1,14 | 0,03623  |
| MIR608     | cluster 1 | 1,47 | 0,03488  |
| MIR708     | cluster 1 | 1,83 | 0,04109  |
| MIR770     | cluster 1 | 1,49 | 0,04737  |
| MIR887     | cluster 1 | 1,27 | 0,04015  |
| MIR99A     | cluster 1 | 1,4  | 0,03111  |
| MIRLET7C   | cluster 1 | 1,5  | 0,03562  |
| MORN5      | cluster 1 | 1,74 | 0,00422  |
| MPPED1     | cluster 1 | 2,55 | 0,04063  |
| MRAP2      | cluster 1 | 1,23 | 0,0367   |
| MROH2B     | cluster 1 | 2,13 | 0,04994  |
| MROH7-TTC4 | cluster 1 | 1,55 | 0,00118  |
| MS4A8      | cluster 1 | 3,2  | 0,00091  |
| MTAPP2     | cluster 1 | 1,15 | 0,04768  |



|          |           |       |          |
|----------|-----------|-------|----------|
| MTRNR2L4 | cluster 1 | 1,29  | 0,02083  |
| MTTP     | cluster 1 | 1,88  | 0,0014   |
| MTUS2    | cluster 1 | 1,62  | 0,00132  |
| MUC13    | cluster 1 | 1,93  | 0,01847  |
| MUCL1    | cluster 1 | 2,51  | 0,00856  |
| MUM1L1   | cluster 1 | 2,55  | 6,26E-06 |
| MYBPC1   | cluster 1 | 3,46  | 3,97E-05 |
| MYCBPAP  | cluster 1 | 1,11  | 0,00226  |
| MYH11    | cluster 1 | 1,74  | 0,01144  |
| MYLKP1   | cluster 1 | 2,44  | 0,04406  |
| MYO18B   | cluster 1 | 2,07  | 0,02194  |
| MYOCD    | cluster 1 | 2,31  | 0,00218  |
| NANOGP1  | cluster 1 | 2,43  | 0,0228   |
| NCBP2L   | cluster 1 | 3,23  | 0,02151  |
| NDNF     | cluster 1 | 2,26  | 4,48E-05 |
| NDP      | cluster 1 | 2,14  | 0,00157  |
| NDRG2    | cluster 1 | 1,22  | 0,00073  |
| NDST4    | cluster 1 | 5,44  | 1,23E-09 |
| NF1P2    | cluster 1 | 3,16  | 0,02179  |
| NOBOX    | cluster 1 | 2,42  | 0,04954  |
| NOS2     | cluster 1 | 1,25  | 0,04223  |
| NPAP1    | cluster 1 | 3,74  | 3,54E-08 |
| NPM1P50  | cluster 1 | 2,76  | 0,00321  |
| NR1H4    | cluster 1 | 7,2   | 1,43E-21 |
| NR2F2    | cluster 1 | 1,02  | 0,00705  |
| NR5A1    | cluster 1 | 3,79  | 2,03E-05 |
| NRG2     | cluster 1 | 1,98  | 2,38E-07 |
| NTF3     | cluster 1 | 1,22  | 0,03366  |
| NWD1     | cluster 1 | 1,83  | 0,00141  |
| NXF3     | cluster 1 | 1,7   | 0,00138  |
| OR11H3P  | cluster 1 | 5,41  | 4,48E-05 |
| OR13C2   | cluster 1 | 1,44  | 0,04954  |
| OR2J3    | cluster 1 | 2,71  | 0,0291   |
| OR2J4P   | cluster 1 | 2,58  | 0,0424   |
| OR2M3    | cluster 1 | 2,71  | 0,00743  |
| OR4D9    | cluster 1 | 12,85 | 0,00072  |
| OR4N3P   | cluster 1 | 3,82  | 0,00299  |
| OR4Q3    | cluster 1 | 4,87  | 0,01959  |
| OR51B2   | cluster 1 | 1,16  | 0,03704  |
| OR51B6   | cluster 1 | 1,3   | 0,02143  |
| OR52I1   | cluster 1 | 1,23  | 0,00863  |
| OR6C65   | cluster 1 | 22,3  | 3,66E-11 |
| OR7A5    | cluster 1 | 2,95  | 0,02013  |
| OR7E102P | cluster 1 | 1,37  | 0,01451  |
| OR7E47P  | cluster 1 | 2,02  | 9,16E-05 |

|          |           |       |          |
|----------|-----------|-------|----------|
| OR8D4    | cluster 1 | 2,4   | 0,0071   |
| OR8H1    | cluster 1 | 12,89 | 0,00069  |
| OR8S1    | cluster 1 | 2,96  | 4,01E-05 |
| OSR2     | cluster 1 | 1,28  | 0,02795  |
| OSTCP2   | cluster 1 | 1,3   | 0,01487  |
| OSTCP5   | cluster 1 | 1,9   | 0,00669  |
| OVGP1    | cluster 1 | 1,9   | 0,00176  |
| OXCT2P1  | cluster 1 | 1,63  | 0,00522  |
| PABPC5   | cluster 1 | 1,23  | 0,00842  |
| PACRG    | cluster 1 | 1,58  | 0,00011  |
| PAGE4    | cluster 1 | 3,15  | 0,01231  |
| PCBP2P1  | cluster 1 | 1,02  | 0,04618  |
| PCDH11X  | cluster 1 | 3,86  | 8,32E-11 |
| PCDH11Y  | cluster 1 | 1,24  | 0,01981  |
| PCDP1    | cluster 1 | 1,2   | 0,00896  |
| PCSK6    | cluster 1 | 1,96  | 0,00035  |
| PDZD3    | cluster 1 | 1,07  | 0,02581  |
| PEBP4    | cluster 1 | 1,71  | 0,00901  |
| PEG3     | cluster 1 | 4,55  | 1,63E-18 |
| PGC      | cluster 1 | 1,99  | 0,02455  |
| PGM5     | cluster 1 | 1,29  | 0,00187  |
| PGM5P1   | cluster 1 | 1,46  | 0,0002   |
| PGR      | cluster 1 | 2,53  | 2,30E-06 |
| PHACTR3  | cluster 1 | 1,4   | 0,02593  |
| PHF21B   | cluster 1 | 1,58  | 0,02139  |
| PI15     | cluster 1 | 1,18  | 0,03366  |
| PIFO     | cluster 1 | 1,33  | 0,00303  |
| PIH1D3   | cluster 1 | 3,27  | 0,00105  |
| PIK3C2G  | cluster 1 | 3,2   | 0,00022  |
| PIRT     | cluster 1 | 2,75  | 0,00791  |
| PITPNM3  | cluster 1 | 1,17  | 0,00278  |
| PLA2G1B  | cluster 1 | 2,23  | 5,52E-05 |
| PLA2G5   | cluster 1 | 1,6   | 0,0119   |
| PLCXD3   | cluster 1 | 2,19  | 0,00258  |
| PLD5     | cluster 1 | 2,21  | 0,02194  |
| PLG      | cluster 1 | 1,69  | 0,00218  |
| PON3     | cluster 1 | 1,5   | 0,02902  |
| POTEH    | cluster 1 | 2,33  | 0,02089  |
| POTEM    | cluster 1 | 2,59  | 0,01621  |
| PPP1R14D | cluster 1 | 1,1   | 0,03767  |
| PPP1R3A  | cluster 1 | 4,02  | 0,01948  |
| PPP1R42  | cluster 1 | 1,2   | 0,04153  |
| PPP2R2C  | cluster 1 | 1,81  | 0,03846  |
| PPP4R4   | cluster 1 | 2,21  | 3,50E-06 |
| PRDM7    | cluster 1 | 1,42  | 0,00822  |

|                |           |      |          |
|----------------|-----------|------|----------|
| PRKAG3         | cluster 1 | 1,47 | 0,04406  |
| PRLR           | cluster 1 | 1,2  | 0,00605  |
| PRMT8          | cluster 1 | 1,65 | 0,00823  |
| PROK1          | cluster 1 | 5,91 | 5,61E-13 |
| PRR23B         | cluster 1 | 2,82 | 0,03108  |
| PRRT1          | cluster 1 | 1,86 | 1,32E-06 |
| PRRT2          | cluster 1 | 1,38 | 0,00026  |
| PRSS35         | cluster 1 | 1,78 | 0,00252  |
| PTCH2          | cluster 1 | 1,14 | 0,00314  |
| PTPN5          | cluster 1 | 2,35 | 7,72E-05 |
| RAB3A          | cluster 1 | 1,09 | 0,00108  |
| RAB9B          | cluster 1 | 1,45 | 0,00078  |
| RANBP20P       | cluster 1 | 1,9  | 0,00863  |
| RASL11B        | cluster 1 | 1,31 | 0,00261  |
| RBBP4P4        | cluster 1 | 1,98 | 0,0034   |
| RBFOX3         | cluster 1 | 1,75 | 0,00342  |
| RBM24          | cluster 1 | 1,35 | 0,03541  |
| RBP1           | cluster 1 | 1,44 | 2,77E-05 |
| RBP3           | cluster 1 | 2,43 | 0,01645  |
| RGAG1          | cluster 1 | 3,04 | 1,12E-07 |
| RGS22          | cluster 1 | 1,62 | 0,00023  |
| RGS7           | cluster 1 | 2,33 | 0,00115  |
| RGS7BP         | cluster 1 | 1,18 | 0,01802  |
| RHBDL3         | cluster 1 | 1,4  | 0,04341  |
| RHBG           | cluster 1 | 4,02 | 3,66E-11 |
| RIMS2          | cluster 1 | 2,35 | 0,00545  |
| RN7SL417P      | cluster 1 | 1,17 | 0,01212  |
| ROBO2          | cluster 1 | 1,4  | 0,04684  |
| ROPN1L         | cluster 1 | 1,45 | 0,0357   |
| RP1-102E24.9   | cluster 1 | 1,69 | 0,04614  |
| RP11-114F3.2   | cluster 1 | 2,02 | 0,03521  |
| RP11-119H12.1  | cluster 1 | 2,67 | 0,00017  |
| RP11-125B21.2  | cluster 1 | 2,94 | 0,00045  |
| RP11-1260E13.4 | cluster 1 | 1,32 | 0,01085  |
| RP11-12M9.4    | cluster 1 | 1,2  | 0,02972  |
| RP11-136C24.1  | cluster 1 | 1,07 | 0,04649  |
| RP11-137N23.1  | cluster 1 | 2,91 | 2,86E-05 |
| RP11-138H14.1  | cluster 1 | 3,72 | 0,00609  |
| RP11-16F15.2   | cluster 1 | 1,01 | 0,00493  |
| RP11-17M16.1   | cluster 1 | 2,29 | 0,00136  |
| RP11-181C3.1   | cluster 1 | 1,08 | 0,04057  |
| RP11-182N22.7  | cluster 1 | 1,41 | 0,01051  |
| RP11-1C1.5     | cluster 1 | 2,38 | 0,01884  |
| RP11-219C20.1  | cluster 1 | 1,09 | 0,04064  |
| RP11-231C14.5  | cluster 1 | 3,31 | 0,02358  |

|               |           |       |          |
|---------------|-----------|-------|----------|
| RP11-261B23.1 | cluster 1 | 2,81  | 0,00525  |
| RP11-26F2.1   | cluster 1 | 2,36  | 0,00134  |
| RP11-30K9.1   | cluster 1 | 1,11  | 0,03737  |
| RP11-345P4.9  | cluster 1 | 1,33  | 0,01833  |
| RP11-34P1.2   | cluster 1 | 1,23  | 0,01056  |
| RP11-350G24.2 | cluster 1 | 2,56  | 7,72E-05 |
| RP11-360D2.1  | cluster 1 | 1,4   | 0,0044   |
| RP11-366O20.5 | cluster 1 | 1,55  | 0,01681  |
| RP11-379B18.6 | cluster 1 | 1,2   | 0,00234  |
| RP11-390M11.1 | cluster 1 | 2,44  | 0,02337  |
| RP11-391M20.1 | cluster 1 | 1,5   | 0,00043  |
| RP11-400K9.2  | cluster 1 | 2,09  | 0,00638  |
| RP11-415I12.2 | cluster 1 | 2,53  | 0,01643  |
| RP11-420K14.1 | cluster 1 | 2,42  | 0,00426  |
| RP1-144F13.4  | cluster 1 | 3,53  | 0,00057  |
| RP11-494K3.2  | cluster 1 | 1,96  | 0,00172  |
| RP11-503N18.1 | cluster 1 | 2,1   | 0,00531  |
| RP11-506B6.3  | cluster 1 | 1,22  | 0,02476  |
| RP11-510M2.4  | cluster 1 | 13,16 | 0,00049  |
| RP11-524L6.4  | cluster 1 | 2,18  | 0,03845  |
| RP11-549L6.2  | cluster 1 | 1,01  | 0,01528  |
| RP11-553K23.2 | cluster 1 | 1     | 0,00574  |
| RP11-567G24.1 | cluster 1 | 1,93  | 0,00938  |
| RP11-56A10.1  | cluster 1 | 1,14  | 0,0461   |
| RP11-598O12.1 | cluster 1 | 2,28  | 0,00695  |
| RP11-5N11.1   | cluster 1 | 1,89  | 0,00679  |
| RP11-62G11.1  | cluster 1 | 2,24  | 0,00896  |
| RP11-728F11.4 | cluster 1 | 2,01  | 0,00299  |
| RP11-72M17.1  | cluster 1 | 1,29  | 0,01392  |
| RP11-748H22.1 | cluster 1 | 2,57  | 0,00361  |
| RP11-76H14.2  | cluster 1 | 2,67  | 0,02297  |
| RP11-774O3.3  | cluster 1 | 1,14  | 0,00194  |
| RP11-788M5.3  | cluster 1 | 1,84  | 0,02218  |
| RP11-844P9.2  | cluster 1 | 2,21  | 0,00347  |
| RP11-844P9.3  | cluster 1 | 1,35  | 4,07E-05 |
| RP11-851M3.1  | cluster 1 | 2     | 0,0028   |
| RP11-87H9.2   | cluster 1 | 1,17  | 0,00361  |
| RP11-87H9.3   | cluster 1 | 1,17  | 0,01056  |
| RP11-928F19.2 | cluster 1 | 3,8   | 0,01201  |
| RP1-28C20.1   | cluster 1 | 2,81  | 0,00921  |
| RP1-32I10.10  | cluster 1 | 2,78  | 0,04166  |
| RP1-3E10.2    | cluster 1 | 1,18  | 0,02112  |
| RP3-382I10.3  | cluster 1 | 1,85  | 0,04166  |
| RP3-412A9.16  | cluster 1 | 1,69  | 0,0184   |
| RPE65         | cluster 1 | 1,94  | 0,00823  |

|             |           |      |          |
|-------------|-----------|------|----------|
| RPL21P17    | cluster 1 | 2,47 | 0,03108  |
| RPL5P1      | cluster 1 | 2,91 | 0,00663  |
| RPL7AP30    | cluster 1 | 1,5  | 0,00682  |
| RPRM        | cluster 1 | 1,17 | 0,03895  |
| RPS4XP13    | cluster 1 | 2,37 | 0,03234  |
| RPSAP14     | cluster 1 | 1,25 | 0,01318  |
| RRM2P3      | cluster 1 | 1,15 | 0,01294  |
| RSL24D1P2   | cluster 1 | 2,54 | 0,00982  |
| RSPH1       | cluster 1 | 1,28 | 0,00746  |
| RXFP2       | cluster 1 | 2,56 | 0,01734  |
| SALL1       | cluster 1 | 1,72 | 0,01285  |
| SAR1AP4     | cluster 1 | 1,94 | 0,03569  |
| SCGB1D2     | cluster 1 | 1,83 | 0,0187   |
| SCGB2A1     | cluster 1 | 2,29 | 0,0067   |
| SCGB2A2     | cluster 1 | 4,81 | 0,00448  |
| SCN1A       | cluster 1 | 3,03 | 0,00028  |
| SCN7A       | cluster 1 | 2,95 | 3,11E-08 |
| SCUBE1      | cluster 1 | 3,17 | 9,03E-09 |
| SDIM1       | cluster 1 | 2,46 | 0,02475  |
| SEL1L2      | cluster 1 | 2,01 | 0,0049   |
| SERPINA10   | cluster 1 | 2,86 | 1,98E-06 |
| SERPINA6    | cluster 1 | 3,48 | 0,00293  |
| SERPINI2    | cluster 1 | 1,77 | 0,03387  |
| SETP2       | cluster 1 | 3,63 | 0,00158  |
| SF3A3P2     | cluster 1 | 1,03 | 0,01907  |
| SGCZ        | cluster 1 | 5,7  | 6,04E-08 |
| SH3GL2      | cluster 1 | 2,04 | 0,00883  |
| SHH         | cluster 1 | 2,7  | 0,01294  |
| SIGLEC11    | cluster 1 | 4,1  | 2,54E-11 |
| SIGLEC16    | cluster 1 | 2,28 | 0,00015  |
| SLC16A9     | cluster 1 | 2,08 | 1,23E-09 |
| SLC17A3     | cluster 1 | 1,88 | 0,02044  |
| SLC27A6     | cluster 1 | 1,48 | 0,00894  |
| SLC28A2     | cluster 1 | 1,2  | 0,0206   |
| SLC30A10    | cluster 1 | 2,68 | 0,01199  |
| SLC5A8      | cluster 1 | 4,93 | 9,91E-06 |
| SLC7A14     | cluster 1 | 1,66 | 0,01819  |
| SLITRK3     | cluster 1 | 4,3  | 7,90E-06 |
| SNCAIP      | cluster 1 | 1,06 | 0,03686  |
| SNORD115-29 | cluster 1 | 4,38 | 0,03961  |
| SNRPGP1     | cluster 1 | 1,26 | 0,04195  |
| SNRPGP10    | cluster 1 | 5,2  | 2,48E-15 |
| SNTN        | cluster 1 | 2,87 | 0,00027  |
| SOBP        | cluster 1 | 1,08 | 0,00507  |
| SPAM1       | cluster 1 | 8,77 | 9,03E-09 |

|           |           |      |          |
|-----------|-----------|------|----------|
| SPATA31C1 | cluster 1 | 1,62 | 0,0487   |
| SPHKAP    | cluster 1 | 5,58 | 1,56E-08 |
| SPRR2F    | cluster 1 | 5,96 | 1,05E-07 |
| SRRM4     | cluster 1 | 2,68 | 0,03372  |
| SSTR3     | cluster 1 | 1,81 | 0,02566  |
| ST13P20   | cluster 1 | 1,86 | 0,00677  |
| STAR      | cluster 1 | 5,59 | 9,12E-25 |
| STOML3    | cluster 1 | 3,56 | 0,00023  |
| STXBP5L   | cluster 1 | 2,35 | 7,41E-05 |
| SUPT20HL2 | cluster 1 | 3,83 | 3,96E-06 |
| SUSD4     | cluster 1 | 1,05 | 0,00714  |
| SYNGR1    | cluster 1 | 1,04 | 0,00041  |
| SYNPO2    | cluster 1 | 1,1  | 0,04592  |
| SYT10     | cluster 1 | 2,72 | 0,00047  |
| SYTL4     | cluster 1 | 1,39 | 0,00301  |
| TAAR9     | cluster 1 | 8,08 | 0,04954  |
| TACR2     | cluster 1 | 1,56 | 0,00181  |
| TBX3      | cluster 1 | 1,12 | 0,00496  |
| TCEAL2    | cluster 1 | 1,11 | 0,03419  |
| TCEAL6    | cluster 1 | 3,13 | 9,81E-05 |
| TCERG1L   | cluster 1 | 4,29 | 9,41E-07 |
| TCF21     | cluster 1 | 2,33 | 0,00028  |
| TCF23     | cluster 1 | 2,3  | 1,05E-07 |
| TCTE1     | cluster 1 | 2,01 | 0,00824  |
| TDGF1     | cluster 1 | 2,72 | 0,0014   |
| TDRD1     | cluster 1 | 1,81 | 0,00222  |
| TEKT1     | cluster 1 | 2,41 | 0,00408  |
| TEKT3     | cluster 1 | 1,04 | 0,01064  |
| TEKT4     | cluster 1 | 1,29 | 0,03619  |
| TFAP2B    | cluster 1 | 5,11 | 0,04152  |
| TGFBR3    | cluster 1 | 1,16 | 0,0005   |
| TMEM150C  | cluster 1 | 1,11 | 0,00472  |
| TMEM211   | cluster 1 | 2,19 | 0,01581  |
| TMEM215   | cluster 1 | 1,72 | 0,00925  |
| TMEM233   | cluster 1 | 1,18 | 0,03989  |
| TMEM27    | cluster 1 | 1,07 | 0,02194  |
| TMEM61    | cluster 1 | 1,78 | 0,02502  |
| TOX3      | cluster 1 | 1,96 | 0,042    |
| TRABD2A   | cluster 1 | 2,6  | 2,81E-06 |
| TRDN      | cluster 1 | 2,34 | 0,0206   |
| TRH       | cluster 1 | 1,38 | 0,03767  |
| TRPC4     | cluster 1 | 1,36 | 0,01069  |
| TSPAN5    | cluster 1 | 1,2  | 0,00584  |
| TSPAN8    | cluster 1 | 3,61 | 3,81E-12 |
| TTC29     | cluster 1 | 2,11 | 0,00399  |

|               |           |       |          |
|---------------|-----------|-------|----------|
| TLL6          | cluster 1 | 2     | 0,00381  |
| TUBA4B        | cluster 1 | 1,69  | 0,02713  |
| TXLNB         | cluster 1 | 1,1   | 0,03737  |
| U1            | cluster 1 | 1,82  | 0,02864  |
| UBXN8         | cluster 1 | 1,19  | 0,00014  |
| UNC13A        | cluster 1 | 2,01  | 0,00705  |
| UNC13C        | cluster 1 | 2,36  | 0,00206  |
| UNC80         | cluster 1 | 3,24  | 7,57E-11 |
| UPF3AP1       | cluster 1 | 1,03  | 0,02799  |
| VDAC1P3       | cluster 1 | 3,19  | 0,0001   |
| VIT           | cluster 1 | 3,2   | 7,21E-05 |
| VLDLR         | cluster 1 | 1,31  | 0,00023  |
| VSTM4         | cluster 1 | 1,33  | 0,00698  |
| VSX1          | cluster 1 | 1,8   | 0,00856  |
| VWA3A         | cluster 1 | 1,91  | 0,00011  |
| VWA3B         | cluster 1 | 2,3   | 7,54E-05 |
| VWC2          | cluster 1 | 3,26  | 4,23E-05 |
| VWFP1         | cluster 1 | 1,63  | 0,01811  |
| WASF4P        | cluster 1 | 1,7   | 0,02101  |
| WBSCR17       | cluster 1 | 1,16  | 0,03116  |
| WDR16         | cluster 1 | 1,69  | 0,00035  |
| WDR38         | cluster 1 | 1,78  | 0,00013  |
| WDR63         | cluster 1 | 1,27  | 0,00733  |
| WDR96         | cluster 1 | 1,21  | 0,02756  |
| WFIKKN2       | cluster 1 | 4,81  | 1,72E-09 |
| WIF1          | cluster 1 | 2,44  | 0,02779  |
| WIPF3         | cluster 1 | 2,56  | 4,45E-11 |
| WNT2B         | cluster 1 | 1,14  | 0,00574  |
| XRCC6P2       | cluster 1 | 1,38  | 0,02333  |
| YBX1P6        | cluster 1 | 1,67  | 0,01425  |
| ZCCHC12       | cluster 1 | 3,62  | 3,21E-06 |
| ZDHHC8P1      | cluster 1 | 1,25  | 0,04286  |
| ZIC3          | cluster 1 | 3,2   | 0,03619  |
| ZIM2          | cluster 1 | 2,06  | 0,00012  |
| ZMYND10       | cluster 1 | 1,28  | 0,0052   |
| ZNF300P1      | cluster 1 | 1,12  | 0,0438   |
| ZNF385B       | cluster 1 | 2,81  | 2,20E-05 |
| ZNF556        | cluster 1 | 1,37  | 0,00527  |
| ZNF559-ZNF177 | cluster 1 | 1,53  | 0,00925  |
| ZNF728        | cluster 1 | 1,51  | 0,02804  |
| ZPBP          | cluster 1 | 2,34  | 0,0001   |
| ZSWIM5        | cluster 1 | 1,81  | 1,20E-07 |
| AC104820.2    | cluster 2 | -3,08 | 0,00321  |
| ADIPOQ        | cluster 2 | -5,31 | 3,92E-05 |
| ADRB2         | cluster 2 | -1    | 0,03372  |

|            |           |       |          |
|------------|-----------|-------|----------|
| AGAP2      | cluster 2 | -1,44 | 0,0009   |
| AIF1       | cluster 2 | -1,01 | 0,00332  |
| AIM1       | cluster 2 | -1,02 | 0,00057  |
| AIM2       | cluster 2 | -1,66 | 0,00101  |
| AMICA1     | cluster 2 | -1,64 | 0,00012  |
| ANTXRPL1   | cluster 2 | -2,51 | 0,00069  |
| AOAH       | cluster 2 | -1,51 | 8,53E-05 |
| AP000354.4 | cluster 2 | -1,17 | 0,03541  |
| APBB1IP    | cluster 2 | -1,49 | 7,16E-05 |
| APOBR      | cluster 2 | -1,14 | 0,00871  |
| APOC1      | cluster 2 | -1,35 | 0,00646  |
| APOE       | cluster 2 | -1,03 | 0,01452  |
| AQP7       | cluster 2 | -3,4  | 5,47E-07 |
| AQP7P3     | cluster 2 | -2,53 | 0,00164  |
| ARHGAP15   | cluster 2 | -1,62 | 0,00045  |
| ARHGAP9    | cluster 2 | -1,52 | 0,00016  |
| ARHGDIB    | cluster 2 | -1,2  | 0,00013  |
| ARRDC5     | cluster 2 | -1,54 | 0,00113  |
| ARSI       | cluster 2 | -1,72 | 0,0027   |
| ASS1P1     | cluster 2 | -2,07 | 0,00282  |
| ATP2A3     | cluster 2 | -1,53 | 0,00035  |
| BANK1      | cluster 2 | -1,51 | 0,00814  |
| BATF       | cluster 2 | -1,27 | 0,01841  |
| BATF3      | cluster 2 | -1,38 | 0,00705  |
| BCL11B     | cluster 2 | -1,74 | 0,00046  |
| BCL2A1     | cluster 2 | -1,44 | 0,00503  |
| BDKRB1     | cluster 2 | -2,53 | 2,76E-05 |
| BHLHE22    | cluster 2 | -2,83 | 0,00013  |
| BIN2       | cluster 2 | -1,53 | 1,95E-05 |
| BIRC3      | cluster 2 | -1,27 | 0,00548  |
| BLK        | cluster 2 | -2,38 | 0,00094  |
| BTK        | cluster 2 | -1,41 | 4,26E-05 |
| C11orf21   | cluster 2 | -1,54 | 0,01674  |
| C12orf79   | cluster 2 | -1,26 | 0,02879  |
| C16orf54   | cluster 2 | -1,63 | 0,01599  |
| C1orf162   | cluster 2 | -1,1  | 0,00163  |
| C1QB       | cluster 2 | -1,02 | 0,00679  |
| C5orf58    | cluster 2 | -1,47 | 0,02249  |
| CA3        | cluster 2 | -1,2  | 0,04148  |
| CAMK4      | cluster 2 | -1,1  | 0,01114  |
| CBFA2T3    | cluster 2 | -1,19 | 0,01822  |
| CCDC141    | cluster 2 | -1,31 | 0,02619  |
| CCL19      | cluster 2 | -1,93 | 0,01304  |
| CCL2       | cluster 2 | -1,68 | 9,17E-05 |
| CCL22      | cluster 2 | -1,63 | 0,00761  |



|         |           |       |          |
|---------|-----------|-------|----------|
| CCL4    | cluster 2 | -1,6  | 0,00111  |
| CCL5    | cluster 2 | -1,62 | 0,00195  |
| CCR1    | cluster 2 | -1,06 | 0,01208  |
| CCR2    | cluster 2 | -1,19 | 0,01497  |
| CCR4    | cluster 2 | -2,13 | 2,01E-05 |
| CCR5    | cluster 2 | -1,51 | 0,00065  |
| CCR7    | cluster 2 | -1,7  | 0,0008   |
| CCRL2   | cluster 2 | -1,14 | 0,01101  |
| CD180   | cluster 2 | -1,5  | 4,76E-05 |
| CD1C    | cluster 2 | -2,06 | 0,00138  |
| CD1D    | cluster 2 | -1,01 | 0,03676  |
| CD1E    | cluster 2 | -2,18 | 0,00908  |
| CD2     | cluster 2 | -1,81 | 0,00042  |
| CD226   | cluster 2 | -1,11 | 0,00262  |
| CD247   | cluster 2 | -1,42 | 0,0048   |
| CD28    | cluster 2 | -1,66 | 0,00096  |
| CD300E  | cluster 2 | -1,31 | 0,04532  |
| CD300LB | cluster 2 | -1,34 | 0,04229  |
| CD300LF | cluster 2 | -1,02 | 0,04097  |
| CD36    | cluster 2 | -3,33 | 1,47E-11 |
| CD3D    | cluster 2 | -2,03 | 0,00047  |
| CD3E    | cluster 2 | -1,99 | 0,00021  |
| CD3G    | cluster 2 | -2,07 | 0,00018  |
| CD4     | cluster 2 | -1,05 | 0,00018  |
| CD40LG  | cluster 2 | -1,48 | 0,00271  |
| CD48    | cluster 2 | -1,81 | 0,00012  |
| CD52    | cluster 2 | -1,97 | 1,39E-05 |
| CD53    | cluster 2 | -1,46 | 9,16E-05 |
| CD6     | cluster 2 | -1,35 | 0,00076  |
| CD69    | cluster 2 | -1,52 | 0,00017  |
| CD79A   | cluster 2 | -1,92 | 0,00544  |
| CD79B   | cluster 2 | -1,28 | 0,04772  |
| CD83    | cluster 2 | -1,09 | 0,00094  |
| CD84    | cluster 2 | -1,38 | 0,00039  |
| CD86    | cluster 2 | -1,22 | 0,00032  |
| CD8A    | cluster 2 | -2,05 | 0,00011  |
| CD8B    | cluster 2 | -1,84 | 0,00309  |
| CD96    | cluster 2 | -1,92 | 0,0002   |
| CERKL   | cluster 2 | -1,2  | 0,00077  |
| CFD     | cluster 2 | -1,59 | 0,00932  |
| CIDEA   | cluster 2 | -6,07 | 6,05E-13 |
| CIDEC   | cluster 2 | -6,13 | 1,15E-11 |
| CLEC10A | cluster 2 | -1,24 | 0,037    |
| CLEC12A | cluster 2 | -1,14 | 0,04752  |
| CLEC17A | cluster 2 | -1,82 | 0,01387  |

|               |           |       |          |
|---------------|-----------|-------|----------|
| CLEC4C        | cluster 2 | -1,65 | 0,03869  |
| CLEC4E        | cluster 2 | -1,16 | 0,043    |
| CLEC7A        | cluster 2 | -1,05 | 0,0071   |
| CLECL1        | cluster 2 | -1,11 | 0,02269  |
| CNR2          | cluster 2 | -1,7  | 0,02214  |
| COL19A1       | cluster 2 | -2,07 | 0,006    |
| COL6A6        | cluster 2 | -1,25 | 0,00572  |
| CORO1A        | cluster 2 | -1,28 | 7,56E-06 |
| COTL1         | cluster 2 | -1,05 | 6,69E-06 |
| CR1           | cluster 2 | -1,35 | 0,00703  |
| CRTAM         | cluster 2 | -1,47 | 0,02896  |
| CSF2RA        | cluster 2 | -1,11 | 0,00404  |
| CSF2RB        | cluster 2 | -1,56 | 0,00037  |
| CST7          | cluster 2 | -1,44 | 0,00095  |
| CTD-2265D6.2  | cluster 2 | -1,07 | 0,0409   |
| CTD-2547L24.3 | cluster 2 | -1,29 | 0,00972  |
| CTLA4         | cluster 2 | -1,73 | 0,00332  |
| CTSS          | cluster 2 | -1,09 | 0,00304  |
| CXCL13        | cluster 2 | -1,86 | 0,01488  |
| CXCL2         | cluster 2 | -2,11 | 0,00023  |
| CXCL3         | cluster 2 | -1,98 | 0,00046  |
| CXCL9         | cluster 2 | -1,68 | 0,02012  |
| CXCR3         | cluster 2 | -1,41 | 0,00482  |
| CXCR5         | cluster 2 | -1,93 | 0,0018   |
| CXorf21       | cluster 2 | -1,39 | 0,00021  |
| CYBB          | cluster 2 | -1,05 | 0,00268  |
| CYTH4         | cluster 2 | -1,19 | 0,00075  |
| CYTIP         | cluster 2 | -1,88 | 5,47E-05 |
| DGAT2         | cluster 2 | -1,77 | 0,001    |
| DLC1          | cluster 2 | -1,11 | 0,0083   |
| DOCK11        | cluster 2 | -1,57 | 4,22E-05 |
| DOCK2         | cluster 2 | -1,56 | 3,87E-05 |
| DOCK8         | cluster 2 | -1,36 | 0,0001   |
| DOK2          | cluster 2 | -1,21 | 0,00594  |
| DOK3          | cluster 2 | -1,15 | 0,00028  |
| DPEP2         | cluster 2 | -1,42 | 0,00026  |
| DPYS          | cluster 2 | -2,58 | 0,00182  |
| DUSP4         | cluster 2 | -1,21 | 0,0296   |
| EBI3          | cluster 2 | -1,37 | 0,00208  |
| ELL2          | cluster 2 | -1,16 | 0,01319  |
| ELTD1         | cluster 2 | -1,07 | 0,00856  |
| EMB           | cluster 2 | -1,58 | 0,00015  |
| EOMES         | cluster 2 | -2    | 0,00029  |
| EPGN          | cluster 2 | -1,91 | 0,01184  |
| ERMN          | cluster 2 | -1,41 | 0,03737  |

|         |           |       |          |
|---------|-----------|-------|----------|
| ETS1    | cluster 2 | -1,12 | 5,47E-05 |
| EVI2B   | cluster 2 | -1,1  | 0,00078  |
| FABP4   | cluster 2 | -5,6  | 1,21E-20 |
| FAIM3   | cluster 2 | -2,38 | 4,19E-06 |
| FAM129C | cluster 2 | -1,43 | 0,00354  |
| FAM196B | cluster 2 | -1,09 | 0,00661  |
| FAM26F  | cluster 2 | -1,31 | 0,01797  |
| FAM65B  | cluster 2 | -1,26 | 0,00164  |
| FAM78A  | cluster 2 | -1,28 | 0,001    |
| FCER1G  | cluster 2 | -1,08 | 0,001    |
| FCGR2B  | cluster 2 | -1,17 | 0,00092  |
| FCGR2C  | cluster 2 | -1,02 | 0,018    |
| FCN1    | cluster 2 | -1,24 | 0,01892  |
| FCRL1   | cluster 2 | -3,32 | 0,00057  |
| FCRL2   | cluster 2 | -2,53 | 0,00078  |
| FCRL3   | cluster 2 | -2,66 | 7,68E-05 |
| FCRL5   | cluster 2 | -2,12 | 0,00663  |
| FCRLA   | cluster 2 | -1,9  | 0,04785  |
| FDCSP   | cluster 2 | -2,85 | 0,01026  |
| FERMT3  | cluster 2 | -1,07 | 0,00049  |
| FFAR4   | cluster 2 | -1,12 | 0,03855  |
| FGD3    | cluster 2 | -1,03 | 0,0005   |
| FGR     | cluster 2 | -1,04 | 0,03741  |
| FLI1    | cluster 2 | -1,06 | 0,0005   |
| FLT3    | cluster 2 | -1,31 | 0,03363  |
| FMNL1   | cluster 2 | -1,14 | 2,38E-05 |
| FMO2    | cluster 2 | -1,41 | 0,01884  |
| FOLR2   | cluster 2 | -1,12 | 0,02327  |
| FOSL1   | cluster 2 | -1,74 | 0,00225  |
| FOXF1   | cluster 2 | -1,09 | 0,01696  |
| FPR3    | cluster 2 | -1,38 | 2,05E-05 |
| FUT7    | cluster 2 | -1,32 | 0,00544  |
| FYB     | cluster 2 | -1,47 | 7,67E-05 |
| GAB3    | cluster 2 | -1,27 | 0,00069  |
| GALNT9  | cluster 2 | -2,02 | 0,00418  |
| GAPT    | cluster 2 | -1,15 | 0,04649  |
| GATA3   | cluster 2 | -1,37 | 0,00083  |
| GBP5    | cluster 2 | -1,31 | 0,00902  |
| GCSAM   | cluster 2 | -1,01 | 0,03044  |
| GEM     | cluster 2 | -1,21 | 0,03486  |
| GFI1    | cluster 2 | -1,63 | 0,00142  |
| GHR     | cluster 2 | -1,25 | 0,01136  |
| GIMAP4  | cluster 2 | -1,14 | 0,00408  |
| GIMAP5  | cluster 2 | -1,15 | 0,00454  |
| GIMAP7  | cluster 2 | -1,2  | 0,00418  |

|            |           |       |          |
|------------|-----------|-------|----------|
| GLYAT      | cluster 2 | -3,87 | 0,00492  |
| GMFG       | cluster 2 | -1,4  | 1,28E-05 |
| GOLGA5P1   | cluster 2 | -1,57 | 0,00016  |
| GPAM       | cluster 2 | -1,69 | 8,44E-05 |
| GPD1       | cluster 2 | -3,07 | 1,19E-07 |
| GPNMB      | cluster 2 | -1,33 | 0,00105  |
| GPR114     | cluster 2 | -1,24 | 0,02951  |
| GPR174     | cluster 2 | -2,12 | 0,00027  |
| GPR183     | cluster 2 | -1,1  | 0,00014  |
| GPR65      | cluster 2 | -1,4  | 5,52E-05 |
| GPRIN3     | cluster 2 | -1,11 | 0,00213  |
| GRAP2      | cluster 2 | -1,68 | 0,00194  |
| GVINP1     | cluster 2 | -1,67 | 0,0002   |
| GZMA       | cluster 2 | -1,69 | 0,00147  |
| GZMB       | cluster 2 | -1,39 | 0,02047  |
| GZMH       | cluster 2 | -1,41 | 0,03973  |
| GZMK       | cluster 2 | -2,01 | 0,0018   |
| HAS1       | cluster 2 | -2,44 | 0,00266  |
| HAS2       | cluster 2 | -1,73 | 0,0005   |
| HAVCR2     | cluster 2 | -1,18 | 0,00034  |
| HBEGF      | cluster 2 | -1,08 | 0,00892  |
| HCK        | cluster 2 | -1,15 | 0,00054  |
| HCLS1      | cluster 2 | -1,16 | 0,00051  |
| HCST       | cluster 2 | -1,24 | 7,21E-05 |
| HEPACAM    | cluster 2 | -1,46 | 0,03976  |
| HMHA1      | cluster 2 | -1,47 | 7,67E-05 |
| HNRNPA1P70 | cluster 2 | -1,95 | 0,0471   |
| HNRNPA3P2  | cluster 2 | -1,61 | 0,00048  |
| HP         | cluster 2 | -1,38 | 0,03189  |
| HSPA7      | cluster 2 | -1,08 | 0,01643  |
| HTR7       | cluster 2 | -1,09 | 0,01391  |
| HTRA4      | cluster 2 | -1,08 | 0,03193  |
| ICOS       | cluster 2 | -1,79 | 0,00596  |
| IFNG       | cluster 2 | -2,51 | 0,00092  |
| IGHA2      | cluster 2 | -1,95 | 0,01667  |
| IGHD       | cluster 2 | -2,63 | 0,00127  |
| IGHD1-1    | cluster 2 | -2,09 | 0,02269  |
| IGHD2-15   | cluster 2 | -2,22 | 0,03752  |
| IGHD3-16   | cluster 2 | -2,01 | 0,02353  |
| IGHD3-9    | cluster 2 | -2,66 | 0,00417  |
| IGHD4-17   | cluster 2 | -2,31 | 0,03749  |
| IGHD5-5    | cluster 2 | -2,19 | 0,03409  |
| IGHD6-19   | cluster 2 | -3,02 | 0,00919  |
| IGHD6-6    | cluster 2 | -2,1  | 0,0272   |
| IGHG2      | cluster 2 | -2,03 | 0,01095  |

|          |           |       |          |
|----------|-----------|-------|----------|
| IGHG3    | cluster 2 | -2,06 | 0,0021   |
| IGHM     | cluster 2 | -2,05 | 0,00449  |
| IGHV1-12 | cluster 2 | -2,92 | 0,01452  |
| IGHV1-46 | cluster 2 | -2,02 | 0,03752  |
| IGHV2-5  | cluster 2 | -2,01 | 0,04309  |
| IGHV3-11 | cluster 2 | -1,81 | 0,04469  |
| IGHV3-15 | cluster 2 | -2,06 | 0,0364   |
| IGHV3-20 | cluster 2 | -3,48 | 0,00134  |
| IGHV3-43 | cluster 2 | -3,11 | 0,00178  |
| IGHV3-74 | cluster 2 | -2,13 | 0,01755  |
| IGHV4-34 | cluster 2 | -1,85 | 0,02038  |
| IGHV6-1  | cluster 2 | -1,77 | 0,0373   |
| IGKJ3    | cluster 2 | -2,04 | 0,01116  |
| IGKJ4    | cluster 2 | -1,68 | 0,04223  |
| IGKV1-12 | cluster 2 | -2,03 | 0,03845  |
| IGKV1-17 | cluster 2 | -2,6  | 0,00065  |
| IGKV1-9  | cluster 2 | -1,87 | 0,03269  |
| IGKV5-2  | cluster 2 | -2,18 | 0,02127  |
| IGLC2    | cluster 2 | -1,97 | 0,02013  |
| IGLC3    | cluster 2 | -1,82 | 0,01217  |
| IGLC7    | cluster 2 | -2,04 | 0,00896  |
| IGLV1-36 | cluster 2 | -2,44 | 0,02973  |
| IGLV1-44 | cluster 2 | -2,41 | 0,00572  |
| IGLV1-47 | cluster 2 | -2    | 0,02971  |
| IGLV1-51 | cluster 2 | -1,44 | 0,04028  |
| IGLV2-11 | cluster 2 | -1,95 | 0,03149  |
| IGLV2-14 | cluster 2 | -2,53 | 0,00148  |
| IGLV2-18 | cluster 2 | -2,22 | 0,01443  |
| IGLV2-33 | cluster 2 | -4,95 | 0,00822  |
| IGLV3-1  | cluster 2 | -1,97 | 0,03235  |
| IGLV3-16 | cluster 2 | -2,6  | 0,03028  |
| IGLV3-19 | cluster 2 | -2,15 | 0,02567  |
| IGLV3-21 | cluster 2 | -1,9  | 0,02269  |
| IGLV3-25 | cluster 2 | -1,93 | 0,04362  |
| IGLV4-69 | cluster 2 | -2,6  | 0,00092  |
| IGLV6-57 | cluster 2 | -1,96 | 0,03306  |
| IGLV9-49 | cluster 2 | -2,49 | 0,01981  |
| IKZF1    | cluster 2 | -1,66 | 8,27E-05 |
| IKZF3    | cluster 2 | -1,45 | 0,00537  |
| IL10     | cluster 2 | -1,29 | 0,00921  |
| IL10RA   | cluster 2 | -1,53 | 5,06E-05 |
| IL16     | cluster 2 | -1,43 | 0,00027  |
| IL18R1   | cluster 2 | -1,11 | 0,00028  |
| IL18RAP  | cluster 2 | -1,5  | 0,00346  |
| IL1B     | cluster 2 | -1,57 | 0,00126  |

|          |           |       |          |
|----------|-----------|-------|----------|
| IL1RL1   | cluster 2 | -2,05 | 0,00027  |
| IL21R    | cluster 2 | -1,7  | 0,00449  |
| IL24     | cluster 2 | -2,25 | 3,44E-05 |
| IL2RA    | cluster 2 | -1,25 | 0,03669  |
| IL2RB    | cluster 2 | -1,45 | 0,00887  |
| IL2RG    | cluster 2 | -1,6  | 0,00145  |
| IL32     | cluster 2 | -1,24 | 0,0017   |
| IL6      | cluster 2 | -2,43 | 7,11E-05 |
| IL7R     | cluster 2 | -2,45 | 3,51E-06 |
| IL9R     | cluster 2 | -1,28 | 0,03321  |
| INPP5D   | cluster 2 | -1,19 | 0,0008   |
| IRF4     | cluster 2 | -1,7  | 0,00824  |
| IRF8     | cluster 2 | -1,44 | 0,00016  |
| ISL1     | cluster 2 | -3,53 | 0,00014  |
| ITGA4    | cluster 2 | -1,54 | 4,19E-06 |
| ITGAD    | cluster 2 | -1,24 | 0,02711  |
| ITGAL    | cluster 2 | -1,64 | 0,00046  |
| ITGAX    | cluster 2 | -1,3  | 0,00241  |
| ITGB2    | cluster 2 | -1,09 | 0,00334  |
| ITK      | cluster 2 | -2,29 | 5,47E-05 |
| KBTBD8   | cluster 2 | -1,03 | 0,00844  |
| KCNA3    | cluster 2 | -1,67 | 0,00138  |
| KIAA0125 | cluster 2 | -1,46 | 0,04131  |
| KIAA1239 | cluster 2 | -2,87 | 0,00015  |
| KIF21B   | cluster 2 | -1,06 | 0,00079  |
| KLB      | cluster 2 | -1,79 | 0,00051  |
| KLHDC7B  | cluster 2 | -2,36 | 0,00132  |
| KLHL6    | cluster 2 | -1,4  | 0,00266  |
| KLRC1    | cluster 2 | -1,63 | 0,01056  |
| KLRC3    | cluster 2 | -1,61 | 0,02165  |
| KLRD1    | cluster 2 | -1,21 | 0,03211  |
| KLRG1    | cluster 2 | -1,13 | 0,00207  |
| KMO      | cluster 2 | -1,12 | 0,03851  |
| KYNU     | cluster 2 | -1,34 | 0,00194  |
| LAIR1    | cluster 2 | -1,15 | 0,00023  |
| LAPTM5   | cluster 2 | -1,33 | 2,58E-05 |
| LAX1     | cluster 2 | -1,69 | 0,00408  |
| LCK      | cluster 2 | -1,81 | 0,00022  |
| LCP1     | cluster 2 | -1,22 | 0,00142  |
| LCP2     | cluster 2 | -1,43 | 0,00014  |
| LEP      | cluster 2 | -2,9  | 8,28E-05 |
| LGALS12  | cluster 2 | -4,34 | 6,97E-08 |
| LILRA6   | cluster 2 | -1,18 | 0,01785  |
| LILRB1   | cluster 2 | -1,24 | 0,00113  |
| LILRB2   | cluster 2 | -1,37 | 0,00013  |

|           |           |       |          |
|-----------|-----------|-------|----------|
| LILRB4    | cluster 2 | -1,03 | 0,00895  |
| LIMD2     | cluster 2 | -1,01 | 0,00147  |
| LINC00243 | cluster 2 | -1,29 | 0,03269  |
| LINC00861 | cluster 2 | -1,88 | 0,04132  |
| LIPE      | cluster 2 | -1,33 | 0,00225  |
| LPL       | cluster 2 | -3,33 | 1,71E-10 |
| LRRC18    | cluster 2 | -1,05 | 0,02365  |
| LRRC25    | cluster 2 | -1    | 0,00454  |
| LSP1      | cluster 2 | -1,08 | 0,00952  |
| LST1      | cluster 2 | -1,09 | 0,00575  |
| LTA       | cluster 2 | -1,26 | 0,03835  |
| LTB       | cluster 2 | -1,29 | 0,01733  |
| LY9       | cluster 2 | -2,07 | 5,47E-05 |
| LYZ       | cluster 2 | -1,48 | 0,00451  |
| MAN1A1    | cluster 2 | -1,3  | 0,00092  |
| MCTP1     | cluster 2 | -1,51 | 5,47E-05 |
| MEFV      | cluster 2 | -1,06 | 0,02925  |
| MEOX2     | cluster 2 | -1,77 | 0,00855  |
| MIAT      | cluster 2 | -1,61 | 0,00875  |
| MNDA      | cluster 2 | -1,15 | 0,00216  |
| MPEG1     | cluster 2 | -1,25 | 0,00036  |
| MS4A1     | cluster 2 | -3,04 | 5,47E-05 |
| MS4A4A    | cluster 2 | -1,25 | 0,00469  |
| MS4A6A    | cluster 2 | -1,23 | 0,00037  |
| MS4A7     | cluster 2 | -1,43 | 0,00031  |
| MUC3A     | cluster 2 | -1,75 | 0,00274  |
| MYO1G     | cluster 2 | -1,43 | 9,95E-05 |
| MZB1      | cluster 2 | -1,54 | 0,01401  |
| NCF1B     | cluster 2 | -1,14 | 0,01279  |
| NCF4      | cluster 2 | -1,17 | 0,00862  |
| NCKAP1L   | cluster 2 | -1,39 | 5,41E-05 |
| NFAM1     | cluster 2 | -1,12 | 0,00547  |
| NFATC1    | cluster 2 | -1,46 | 0,00138  |
| NFATC2    | cluster 2 | -1,34 | 0,00034  |
| NKG7      | cluster 2 | -1,36 | 0,01955  |
| NLRC5     | cluster 2 | -1,01 | 0,02092  |
| NLRP1     | cluster 2 | -1,17 | 0,00271  |
| NLRP3     | cluster 2 | -1,46 | 0,00177  |
| NPL       | cluster 2 | -1,16 | 0,00126  |
| OLR1      | cluster 2 | -1,8  | 1,93E-05 |
| OSR1      | cluster 2 | -1,5  | 0,00399  |
| P2RX5     | cluster 2 | -1,66 | 0,01908  |
| P2RY10    | cluster 2 | -2,44 | 3,22E-05 |
| P2RY8     | cluster 2 | -2,22 | 6,41E-05 |
| PARP15    | cluster 2 | -1,98 | 9,73E-06 |

|                |           |       |          |
|----------------|-----------|-------|----------|
| PARVG          | cluster 2 | -1,01 | 0,00497  |
| PAX5           | cluster 2 | -2,88 | 0,001    |
| PDCD1          | cluster 2 | -1,45 | 0,00822  |
| PDE3B          | cluster 2 | -1,72 | 3,11E-05 |
| PDE4B          | cluster 2 | -1,37 | 0,00067  |
| PFKFB1         | cluster 2 | -1,6  | 0,01062  |
| PHLDB2         | cluster 2 | -1,36 | 0,00012  |
| PIK3R5         | cluster 2 | -1,33 | 0,00023  |
| PIK3R6         | cluster 2 | -1,06 | 0,00702  |
| PIM1           | cluster 2 | -1,02 | 0,00049  |
| PIM2           | cluster 2 | -1,14 | 0,01085  |
| PLA2G7         | cluster 2 | -1,2  | 0,01234  |
| PLAC8          | cluster 2 | -1,69 | 0,00039  |
| PLCB2          | cluster 2 | -1,12 | 0,00267  |
| PLEK           | cluster 2 | -1,45 | 3,16E-05 |
| PLIN1          | cluster 2 | -4,91 | 4,70E-19 |
| PLIN4          | cluster 2 | -2,32 | 1,60E-05 |
| POU2AF1        | cluster 2 | -1,66 | 0,01586  |
| POU2F2         | cluster 2 | -1,04 | 0,00267  |
| PPIAP29        | cluster 2 | -1,51 | 0,00587  |
| PRDM1          | cluster 2 | -1,12 | 0,00399  |
| PRF1           | cluster 2 | -1,43 | 0,00644  |
| PRKCB          | cluster 2 | -1,48 | 0,00234  |
| PSTPIP1        | cluster 2 | -1,13 | 0,00226  |
| PTGER4         | cluster 2 | -1,32 | 8,60E-06 |
| PTGS2          | cluster 2 | -1,19 | 0,0286   |
| PTPN22         | cluster 2 | -1,68 | 0,00013  |
| PTPRC          | cluster 2 | -1,88 | 5,20E-06 |
| PTPRCAP        | cluster 2 | -1,07 | 0,01733  |
| PYHIN1         | cluster 2 | -2,01 | 0,00042  |
| RAB37          | cluster 2 | -1,35 | 0,01667  |
| RAC2           | cluster 2 | -1,24 | 0,00311  |
| RASAL3         | cluster 2 | -1,64 | 5,48E-05 |
| RASGRP3        | cluster 2 | -1,03 | 0,00025  |
| RBP4           | cluster 2 | -3,14 | 1,48E-06 |
| RBP7           | cluster 2 | -1,16 | 0,01715  |
| RCSD1          | cluster 2 | -1,3  | 0,00038  |
| RGS1           | cluster 2 | -1,71 | 0,0005   |
| RGS18          | cluster 2 | -1,18 | 0,00314  |
| RGS4           | cluster 2 | -1,42 | 0,00283  |
| RHOH           | cluster 2 | -2,4  | 0,00013  |
| RLTPR          | cluster 2 | -1,27 | 0,00902  |
| RP11-1094M14.4 | cluster 2 | -1,9  | 0,00013  |
| RP11-1094M14.8 | cluster 2 | -1,57 | 0,00098  |
| RP11-1094M14.9 | cluster 2 | -1,27 | 0,01727  |



|                |           |       |          |
|----------------|-----------|-------|----------|
| RP11-148O21.2  | cluster 2 | -2,65 | 0,00562  |
| RP11-322D14.1  | cluster 2 | -1,4  | 0,00743  |
| RP11-347P5.1   | cluster 2 | -1,72 | 0,00437  |
| RP11-380D23.1  | cluster 2 | -1,29 | 0,01242  |
| RP11-434I12.2  | cluster 2 | -1,24 | 0,00862  |
| RP11-463J10.2  | cluster 2 | -1,2  | 0,03668  |
| RP11-477G18.2  | cluster 2 | -1,55 | 0,00654  |
| RP11-4M23.2    | cluster 2 | -2,13 | 0,03521  |
| RP11-553L6.3   | cluster 2 | -2,29 | 0,04096  |
| RP11-564A8.4   | cluster 2 | -2,33 | 0,00113  |
| RP11-564A8.8   | cluster 2 | -1,97 | 0,03791  |
| RP11-66B24.4   | cluster 2 | -1,42 | 0,00208  |
| RP11-677N16.1  | cluster 2 | -2,08 | 7,67E-05 |
| RP11-686D22.10 | cluster 2 | -2,72 | 0,00469  |
| RP11-701P16.2  | cluster 2 | -1,71 | 0,00024  |
| RP11-94L15.2   | cluster 2 | -1,05 | 0,04522  |
| RP1-29C18.8    | cluster 2 | -2,37 | 0,03198  |
| RP3-354N19.3   | cluster 2 | -1,94 | 0,0471   |
| RPL32P1        | cluster 2 | -1,12 | 0,03248  |
| S1PR1          | cluster 2 | -1,08 | 0,00379  |
| S1PR4          | cluster 2 | -1,91 | 0,00214  |
| SAMD3          | cluster 2 | -1,14 | 0,02101  |
| SAMSN1         | cluster 2 | -1,54 | 0,00016  |
| SASH3          | cluster 2 | -1,36 | 0,0003   |
| SCML4          | cluster 2 | -1,68 | 0,00832  |
| SCN4A          | cluster 2 | -1,63 | 0,02386  |
| SELL           | cluster 2 | -1,77 | 0,0005   |
| SELPLG         | cluster 2 | -1,32 | 0,00013  |
| SEMA4A         | cluster 2 | -1,23 | 0,00384  |
| SH2D1A         | cluster 2 | -2,4  | 0,00013  |
| SIGLEC1        | cluster 2 | -1,01 | 0,00615  |
| SIGLEC10       | cluster 2 | -1,22 | 0,00138  |
| SIGLEC7        | cluster 2 | -1,05 | 0,00152  |
| SIRPB2         | cluster 2 | -1,33 | 0,00091  |
| SIRPG          | cluster 2 | -1,56 | 0,0305   |
| SIT1           | cluster 2 | -1,17 | 0,0451   |
| SLA            | cluster 2 | -1,45 | 0,00024  |
| SLAMF1         | cluster 2 | -1,81 | 0,00444  |
| SLAMF6         | cluster 2 | -2,05 | 0,00018  |
| SLAMF7         | cluster 2 | -1,64 | 0,00384  |
| SLAMF8         | cluster 2 | -1,2  | 0,0094   |
| SLC16A7        | cluster 2 | -1,23 | 0,01912  |
| SLC19A3        | cluster 2 | -1,69 | 0,01453  |
| SLC37A2        | cluster 2 | -1,09 | 0,00077  |
| SLCO2B1        | cluster 2 | -1,05 | 0,00073  |

|           |           |       |          |
|-----------|-----------|-------|----------|
| SLFN12L   | cluster 2 | -1,64 | 7,21E-05 |
| SNX10     | cluster 2 | -1,15 | 0,00158  |
| SNX20     | cluster 2 | -1,32 | 0,00154  |
| SP140     | cluster 2 | -1,41 | 0,00631  |
| SPI1      | cluster 2 | -1,05 | 8,27E-05 |
| SPN       | cluster 2 | -1,28 | 0,00537  |
| SRGN      | cluster 2 | -1,17 | 0,00171  |
| SRPX      | cluster 2 | -1,13 | 0,01707  |
| ST8SIA1   | cluster 2 | -1,1  | 0,01971  |
| ST8SIA4   | cluster 2 | -1,09 | 0,00344  |
| STAP1     | cluster 2 | -2,12 | 0,00024  |
| STAT4     | cluster 2 | -1,54 | 0,00115  |
| STEAP4    | cluster 2 | -1,47 | 0,00364  |
| STK10     | cluster 2 | -1,02 | 6,66E-05 |
| STK17B    | cluster 2 | -1,25 | 0,00042  |
| STX11     | cluster 2 | -1,87 | 0,00011  |
| TAGAP     | cluster 2 | -1,28 | 0,00039  |
| TARDBPP1  | cluster 2 | -2,54 | 0,01111  |
| TBX21     | cluster 2 | -1,69 | 0,01069  |
| TFEC      | cluster 2 | -1,16 | 0,00449  |
| THEMIS    | cluster 2 | -2,06 | 0,00094  |
| THRSP     | cluster 2 | -1,66 | 0,0272   |
| TIGIT     | cluster 2 | -1,91 | 0,00016  |
| TIMP4     | cluster 2 | -2,67 | 3,11E-05 |
| TLR10     | cluster 2 | -1,54 | 0,01041  |
| TMC8      | cluster 2 | -1,7  | 1,83E-06 |
| TMEM154   | cluster 2 | -1,17 | 0,00194  |
| TMEM156   | cluster 2 | -1,57 | 0,00921  |
| TMEM200C  | cluster 2 | -1,37 | 0,00493  |
| TMEM88    | cluster 2 | -1,01 | 0,03991  |
| TNFAIP3   | cluster 2 | -1,23 | 0,00451  |
| TNFRSF13C | cluster 2 | -1,36 | 0,00858  |
| TNFRSF9   | cluster 2 | -1,53 | 0,00822  |
| TNFSF8    | cluster 2 | -1,46 | 0,00225  |
| TNIP3     | cluster 2 | -1,71 | 0,01619  |
| TNS4      | cluster 2 | -1,68 | 0,00727  |
| TRAC      | cluster 2 | -1,96 | 0,00015  |
| TRAF3IP3  | cluster 2 | -1,29 | 0,0001   |
| TRAJ1     | cluster 2 | -1,9  | 0,01026  |
| TRAJ10    | cluster 2 | -1,85 | 0,00127  |
| TRAJ11    | cluster 2 | -1,88 | 0,007    |
| TRAJ12    | cluster 2 | -1,67 | 0,00437  |
| TRAJ13    | cluster 2 | -2,06 | 0,00013  |
| TRAJ14    | cluster 2 | -2,04 | 0,00092  |
| TRAJ15    | cluster 2 | -1,73 | 0,01133  |

|          |           |       |          |
|----------|-----------|-------|----------|
| TRAJ16   | cluster 2 | -2,12 | 0,00015  |
| TRAJ17   | cluster 2 | -1,82 | 0,01443  |
| TRAJ18   | cluster 2 | -2,19 | 0,00016  |
| TRAJ19   | cluster 2 | -2,22 | 0,00065  |
| TRAJ2    | cluster 2 | -2,26 | 0,0001   |
| TRAJ20   | cluster 2 | -2,42 | 0,00016  |
| TRAJ21   | cluster 2 | -2,14 | 0,00043  |
| TRAJ22   | cluster 2 | -1,91 | 0,00776  |
| TRAJ23   | cluster 2 | -2,15 | 0,0001   |
| TRAJ25   | cluster 2 | -2,07 | 0,00279  |
| TRAJ26   | cluster 2 | -1,88 | 0,00227  |
| TRAJ27   | cluster 2 | -2,03 | 0,00698  |
| TRAJ28   | cluster 2 | -1,72 | 0,00437  |
| TRAJ29   | cluster 2 | -1,82 | 0,01443  |
| TRAJ3    | cluster 2 | -2,11 | 0,00035  |
| TRAJ30   | cluster 2 | -2,17 | 0,00207  |
| TRAJ31   | cluster 2 | -2,38 | 4,25E-06 |
| TRAJ32   | cluster 2 | -2,06 | 0,01841  |
| TRAJ33   | cluster 2 | -2,15 | 0,00065  |
| TRAJ34   | cluster 2 | -2,25 | 0,00245  |
| TRAJ35   | cluster 2 | -2,02 | 0,00525  |
| TRAJ36   | cluster 2 | -1,75 | 0,00303  |
| TRAJ37   | cluster 2 | -1,86 | 0,00777  |
| TRAJ38   | cluster 2 | -2,1  | 0,00376  |
| TRAJ39   | cluster 2 | -2,48 | 2,58E-05 |
| TRAJ4    | cluster 2 | -1,61 | 0,04423  |
| TRAJ40   | cluster 2 | -2,26 | 0,00304  |
| TRAJ42   | cluster 2 | -1,55 | 0,0184   |
| TRAJ43   | cluster 2 | -1,94 | 0,00705  |
| TRAJ44   | cluster 2 | -1,94 | 0,00894  |
| TRAJ45   | cluster 2 | -1,81 | 0,0083   |
| TRAJ46   | cluster 2 | -2,08 | 0,00494  |
| TRAJ47   | cluster 2 | -1,92 | 0,00118  |
| TRAJ48   | cluster 2 | -1,64 | 0,03386  |
| TRAJ5    | cluster 2 | -2,24 | 3,44E-05 |
| TRAJ52   | cluster 2 | -1,97 | 0,00145  |
| TRAJ56   | cluster 2 | -2,87 | 0,00871  |
| TRAJ6    | cluster 2 | -2    | 0,00077  |
| TRAJ7    | cluster 2 | -2,36 | 0,00451  |
| TRAJ8    | cluster 2 | -2,54 | 0,00018  |
| TRAJ9    | cluster 2 | -1,94 | 0,00061  |
| TRAT1    | cluster 2 | -2,26 | 0,00068  |
| TRAV12-2 | cluster 2 | -1,79 | 0,01832  |
| TRAV12-3 | cluster 2 | -2,5  | 0,00169  |
| TRAV13-1 | cluster 2 | -1,97 | 0,01126  |

|            |           |       |          |
|------------|-----------|-------|----------|
| TRAV16     | cluster 2 | -2,26 | 0,01797  |
| TRAV22     | cluster 2 | -2,33 | 0,01948  |
| TRAV3      | cluster 2 | -2,9  | 0,00118  |
| TRAV4      | cluster 2 | -1,97 | 0,00147  |
| TRAV5      | cluster 2 | -1,77 | 0,04389  |
| TRAV8-2    | cluster 2 | -1,97 | 0,00902  |
| TRAV8-6    | cluster 2 | -2,39 | 0,00646  |
| TRBC2      | cluster 2 | -1,9  | 0,00017  |
| TRBV2      | cluster 2 | -1,99 | 0,02496  |
| TRDC       | cluster 2 | -1,37 | 0,00451  |
| TREH       | cluster 2 | -1,06 | 0,01155  |
| TRGC1      | cluster 2 | -1,58 | 0,02212  |
| TRGC2      | cluster 2 | -1,66 | 0,00655  |
| TRGV1      | cluster 2 | -1,81 | 0,00038  |
| TRGV10     | cluster 2 | -2,21 | 0,0016   |
| TRGV2      | cluster 2 | -1,83 | 0,00705  |
| TRGV3      | cluster 2 | -1,5  | 0,00398  |
| TRGV4      | cluster 2 | -2,03 | 0,00896  |
| TRGV8      | cluster 2 | -1,3  | 0,03769  |
| TUSC5      | cluster 2 | -5,17 | 6,45E-06 |
| TYROBP     | cluster 2 | -1,04 | 0,0014   |
| UBASH3A    | cluster 2 | -1,56 | 0,01172  |
| ULK4P3     | cluster 2 | -1,15 | 0,03541  |
| VAV1       | cluster 2 | -1,07 | 0,01049  |
| WDFY4      | cluster 2 | -1,57 | 8,44E-05 |
| WIPF1      | cluster 2 | -1,17 | 7,43E-05 |
| ZAP70      | cluster 2 | -1,85 | 5,78E-05 |
| ZC3H12D    | cluster 2 | -1,54 | 0,00061  |
| ZNF80      | cluster 2 | -1,63 | 0,01559  |
| ZNF831     | cluster 2 | -2,06 | 0,00094  |
| AC017002.2 | cluster 3 | -1,86 | 0,00236  |
| AC019181.3 | cluster 3 | -1,19 | 0,00396  |
| AC068491.3 | cluster 3 | -1,11 | 0,00572  |
| AC097381.1 | cluster 3 | -1,98 | 0,02279  |
| ACSL1      | cluster 3 | -1,6  | 6,88E-06 |
| ADAM12     | cluster 3 | -1,2  | 0,00619  |
| ADAMTS12   | cluster 3 | -1,32 | 2,21E-05 |
| ADAMTS14   | cluster 3 | -1,02 | 0,01643  |
| ADAMTS2    | cluster 3 | -1,5  | 0,00017  |
| AEBP1      | cluster 3 | -1,12 | 0,00976  |
| AKAP2      | cluster 3 | -1,32 | 0,00027  |
| AL133373.1 | cluster 3 | -1,75 | 0,03331  |
| ALDH1A3    | cluster 3 | -1,97 | 2,08E-09 |
| ALPK2      | cluster 3 | -1,68 | 0,01257  |
| APLNR      | cluster 3 | -1,77 | 0,00025  |

|              |           |       |          |
|--------------|-----------|-------|----------|
| ASPN         | cluster 3 | -1,11 | 0,00109  |
| ATP10A       | cluster 3 | -1,14 | 0,00495  |
| AVPR1A       | cluster 3 | -1,21 | 0,00935  |
| BARX1        | cluster 3 | -3,35 | 0,00126  |
| BGN          | cluster 3 | -1,32 | 0,00017  |
| BNC1         | cluster 3 | -1,58 | 0,00902  |
| C3orf80      | cluster 3 | -2,21 | 0,00407  |
| C5AR1        | cluster 3 | -1,18 | 0,00537  |
| CALB2        | cluster 3 | -1,35 | 0,03116  |
| CBX3P9       | cluster 3 | -1,44 | 0,01443  |
| CCDC102B     | cluster 3 | -1,44 | 1,57E-05 |
| CCDC80       | cluster 3 | -1,44 | 0,00016  |
| CCL3         | cluster 3 | -1,44 | 0,00552  |
| CD14         | cluster 3 | -1,06 | 0,00171  |
| CD163        | cluster 3 | -1,16 | 0,00197  |
| CD93         | cluster 3 | -1,05 | 0,00112  |
| CDR1         | cluster 3 | -1,57 | 0,00127  |
| CEBPA        | cluster 3 | -1,72 | 0,0047   |
| CILP2        | cluster 3 | -1,73 | 0,00016  |
| CMAHP        | cluster 3 | -1,01 | 0,03116  |
| COL10A1      | cluster 3 | -1,07 | 0,02463  |
| COL11A1      | cluster 3 | -1,89 | 0,01085  |
| COL1A1       | cluster 3 | -1,56 | 0,00046  |
| COL1A2       | cluster 3 | -1,32 | 0,00201  |
| COL24A1      | cluster 3 | -1,49 | 0,00207  |
| COL3A1       | cluster 3 | -1,83 | 5,69E-06 |
| COL5A1       | cluster 3 | -1,33 | 6,21E-05 |
| COL5A2       | cluster 3 | -1,59 | 2,01E-05 |
| COL5A3       | cluster 3 | -1,06 | 0,01213  |
| COL8A1       | cluster 3 | -1,81 | 5,47E-05 |
| COL8A2       | cluster 3 | -1,08 | 0,03723  |
| COLEC12      | cluster 3 | -1,29 | 0,0004   |
| COMP         | cluster 3 | -2,35 | 0,00042  |
| COPZ2        | cluster 3 | -1,08 | 0,00572  |
| COX4I2       | cluster 3 | -1,01 | 0,00862  |
| CRISPLD2     | cluster 3 | -1,67 | 0,00038  |
| CSMD2        | cluster 3 | -1,33 | 0,00842  |
| CTB-43E15.3  | cluster 3 | -1,79 | 0,04378  |
| CTD-2328D6.1 | cluster 3 | -1,13 | 0,02858  |
| CTHRC1       | cluster 3 | -1,5  | 7,37E-05 |
| CTSK         | cluster 3 | -1,2  | 0,00201  |
| CXCL1        | cluster 3 | -1,86 | 0,01486  |
| CXCL12       | cluster 3 | -1,05 | 0,00669  |
| CXCL14       | cluster 3 | -2,06 | 0,00215  |
| CYP1B1       | cluster 3 | -1,06 | 0,03211  |

|           |           |       |          |
|-----------|-----------|-------|----------|
| CYR61     | cluster 3 | -1,04 | 0,02639  |
| DBX2      | cluster 3 | -2,13 | 0,02566  |
| DNAJC19P8 | cluster 3 | -2,24 | 0,01252  |
| DSC3      | cluster 3 | -1,55 | 0,00398  |
| EBF2      | cluster 3 | -1,48 | 0,04286  |
| EGFL6     | cluster 3 | -1,05 | 0,01049  |
| EGR2      | cluster 3 | -1,18 | 0,02022  |
| ELFN1     | cluster 3 | -1,31 | 0,00547  |
| ELN       | cluster 3 | -1,11 | 0,00177  |
| EMP1      | cluster 3 | -1    | 0,00746  |
| EPYC      | cluster 3 | -2,39 | 0,00574  |
| ETV1      | cluster 3 | -1,1  | 0,00358  |
| F13A1     | cluster 3 | -1,26 | 0,00199  |
| FAM155A   | cluster 3 | -1,13 | 0,01665  |
| FAM180A   | cluster 3 | -1,23 | 0,0189   |
| FAM89A    | cluster 3 | -1,06 | 0,00408  |
| FAP       | cluster 3 | -1,94 | 2,22E-05 |
| FBLN2     | cluster 3 | -1,38 | 0,00092  |
| FCGR1B    | cluster 3 | -1,3  | 0,00024  |
| FGF1      | cluster 3 | -1,12 | 0,02337  |
| FN1       | cluster 3 | -1,12 | 0,04341  |
| FPR1      | cluster 3 | -1,37 | 0,00042  |
| FZD1      | cluster 3 | -1,01 | 0,00159  |
| G0S2      | cluster 3 | -2,25 | 3,11E-05 |
| GABRB2    | cluster 3 | -1,4  | 0,01257  |
| GADD45B   | cluster 3 | -1,42 | 0,00159  |
| GALNT5    | cluster 3 | -1,28 | 0,00938  |
| GAS1      | cluster 3 | -1,17 | 0,00221  |
| GDF6      | cluster 3 | -1,48 | 0,02804  |
| GFPT2     | cluster 3 | -1,5  | 0,00067  |
| GGT5      | cluster 3 | -1,11 | 0,00199  |
| GJB2      | cluster 3 | -2,13 | 0,0026   |
| GPR116    | cluster 3 | -1,1  | 0,00222  |
| GPR4      | cluster 3 | -1,21 | 0,00261  |
| GPR68     | cluster 3 | -1,43 | 0,00032  |
| GREM1     | cluster 3 | -2,59 | 0,00033  |
| GYG2      | cluster 3 | -1,39 | 0,00092  |
| HEG1      | cluster 3 | -1,12 | 7,67E-05 |
| HIF1A-AS2 | cluster 3 | -1,56 | 0,00824  |
| HLX       | cluster 3 | -1,16 | 0,00011  |
| CH25H     | cluster 3 | -1,91 | 0,0001   |
| CHST11    | cluster 3 | -1,08 | 0,00058  |
| CHSY3     | cluster 3 | -1,08 | 0,00022  |
| ICAM1     | cluster 3 | -1,51 | 5,33E-05 |
| IGF1      | cluster 3 | -1,03 | 0,02972  |

|           |           |       |          |
|-----------|-----------|-------|----------|
| IGFL2     | cluster 3 | -2,14 | 0,00289  |
| IGHG4     | cluster 3 | -3,35 | 1,83E-06 |
| IGLV10-54 | cluster 3 | -2,66 | 0,01056  |
| IL8       | cluster 3 | -1,57 | 0,02381  |
| INHBA     | cluster 3 | -1,98 | 0,00016  |
| ISM1      | cluster 3 | -1,4  | 0,00404  |
| ITGA5     | cluster 3 | -1,11 | 0,00199  |
| ITGBL1    | cluster 3 | -1,52 | 0,02795  |
| KAL1      | cluster 3 | -1,22 | 0,00037  |
| KCNJ15    | cluster 3 | -1,41 | 0,01056  |
| KIF26B    | cluster 3 | -1,55 | 0,00027  |
| KLF6      | cluster 3 | -1,22 | 0,00074  |
| LAMB1     | cluster 3 | -1,15 | 5,60E-05 |
| LDHAL6B   | cluster 3 | -1,02 | 0,00663  |
| LIF       | cluster 3 | -1,09 | 0,04081  |
| LINC00152 | cluster 3 | -1,36 | 0,02381  |
| LOX       | cluster 3 | -1,56 | 1,98E-06 |
| LOXL1     | cluster 3 | -1,2  | 0,00067  |
| LPPR4     | cluster 3 | -1,32 | 0,00733  |
| LRRC15    | cluster 3 | -2,01 | 0,00305  |
| LRRN4     | cluster 3 | -1,59 | 0,00152  |
| LUM       | cluster 3 | -1,72 | 0,00016  |
| LZTS1     | cluster 3 | -1,09 | 0,0035   |
| MAFB      | cluster 3 | -1,05 | 0,00022  |
| MARCKS    | cluster 3 | -1,02 | 0,00105  |
| MATN3     | cluster 3 | -1,51 | 0,00326  |
| MEDAG     | cluster 3 | -1,72 | 0,00159  |
| MFAP5     | cluster 3 | -1,26 | 0,04914  |
| MIR1245A  | cluster 3 | -1,33 | 0,032    |
| MMP11     | cluster 3 | -1,81 | 0,00122  |
| MMP14     | cluster 3 | -1,04 | 0,00111  |
| MMP19     | cluster 3 | -2,1  | 0,00018  |
| MMP2      | cluster 3 | -1,41 | 0,0001   |
| MOXD1     | cluster 3 | -1,52 | 0,00451  |
| MSC       | cluster 3 | -1,23 | 0,00743  |
| MSR1      | cluster 3 | -1,07 | 0,00031  |
| MXRA5     | cluster 3 | -1,28 | 2,55E-05 |
| MXRA5P1   | cluster 3 | -1,86 | 0,00475  |
| NFKBIZ    | cluster 3 | -1,1  | 0,00709  |
| NKD2      | cluster 3 | -1,48 | 0,00124  |
| NNMT      | cluster 3 | -1,99 | 9,91E-06 |
| NTM       | cluster 3 | -1,65 | 0,00887  |
| NUAK1     | cluster 3 | -1,05 | 0,00547  |
| OLFML2B   | cluster 3 | -1,41 | 0,00012  |
| OSM       | cluster 3 | -1,3  | 0,02231  |

|               |           |       |          |
|---------------|-----------|-------|----------|
| P4HA3         | cluster 3 | -1,11 | 0,01443  |
| PIEZO2        | cluster 3 | -1,85 | 2,05E-05 |
| PLAU          | cluster 3 | -1,59 | 0,00042  |
| PLAUR         | cluster 3 | -1,18 | 0,00211  |
| PLK3          | cluster 3 | -1,04 | 0,00244  |
| PLVAP         | cluster 3 | -1,19 | 0,00107  |
| PMEPA1        | cluster 3 | -1,04 | 0,00067  |
| PODNL1        | cluster 3 | -1,31 | 0,01126  |
| POSTN         | cluster 3 | -1,67 | 0,00538  |
| PTGER3        | cluster 3 | -2    | 0,0001   |
| PTGIR         | cluster 3 | -1,56 | 0,00032  |
| RCAN1         | cluster 3 | -1,19 | 0,00051  |
| RFX8          | cluster 3 | -1,33 | 0,00991  |
| RGCC          | cluster 3 | -1,28 | 0,00031  |
| RGS16         | cluster 3 | -1,53 | 0,00028  |
| RN7SL1        | cluster 3 | -1,05 | 0,00896  |
| RP11-114F10.3 | cluster 3 | -2,1  | 0,00145  |
| RP11-117N2.2  | cluster 3 | -1    | 0,0445   |
| RP11-274H2.2  | cluster 3 | -1,37 | 0,01433  |
| RP11-343N15.1 | cluster 3 | -1,54 | 0,01652  |
| RP11-404P21.9 | cluster 3 | -1,9  | 0,00399  |
| RP11-417E7.2  | cluster 3 | -2,34 | 0,02551  |
| RP11-43D4.2   | cluster 3 | -1,01 | 0,02283  |
| RP11-53B2.3   | cluster 3 | -1,15 | 0,04064  |
| RP11-572C15.6 | cluster 3 | -1,69 | 0,00216  |
| RP11-588K22.2 | cluster 3 | -1,89 | 0,02258  |
| RP11-62I21.1  | cluster 3 | -2,36 | 0,00985  |
| RP11-709B3.2  | cluster 3 | -2,06 | 0,01898  |
| RP11-737O24.5 | cluster 3 | -1,42 | 0,0071   |
| RP11-745A24.1 | cluster 3 | -1,02 | 0,01291  |
| RP11-758N13.1 | cluster 3 | -2,57 | 0,00407  |
| RP3-425P12.4  | cluster 3 | -1,16 | 0,01199  |
| RP5-1174J21.2 | cluster 3 | -1,13 | 0,02871  |
| RUNX1         | cluster 3 | -1,21 | 0,00092  |
| SAA1          | cluster 3 | -2,01 | 0,02747  |
| SALL4         | cluster 3 | -1,14 | 0,0184   |
| SCD           | cluster 3 | -1,2  | 0,01764  |
| SDC1          | cluster 3 | -1,09 | 0,01608  |
| SEMA3D        | cluster 3 | -1,38 | 0,0071   |
| SERPINB2      | cluster 3 | -1,87 | 0,00507  |
| SERPINE1      | cluster 3 | -1,86 | 0,00293  |
| SFRP2         | cluster 3 | -3,09 | 1,83E-06 |
| SCHIP1        | cluster 3 | -1,09 | 0,04531  |
| SLC12A8       | cluster 3 | -1,22 | 0,00113  |
| SLC2A3        | cluster 3 | -1,14 | 0,02606  |



|           |           |       |          |
|-----------|-----------|-------|----------|
| SLC35D3   | cluster 3 | -2,13 | 0,02976  |
| SNAI1     | cluster 3 | -1,33 | 0,0014   |
| SOCS3     | cluster 3 | -1,39 | 0,00153  |
| SPARC     | cluster 3 | -1,2  | 0,00057  |
| SPATA20P1 | cluster 3 | -2,07 | 0,03737  |
| SPHK1     | cluster 3 | -1,57 | 0,00043  |
| ST6GAL2   | cluster 3 | -1,15 | 0,00351  |
| STAB1     | cluster 3 | -1,11 | 0,00047  |
| SULF1     | cluster 3 | -1,46 | 0,00015  |
| SVEP1     | cluster 3 | -1,73 | 0,00081  |
| TDO2      | cluster 3 | -1,49 | 0,01416  |
| TENM3     | cluster 3 | -1,05 | 0,02116  |
| TGFB3     | cluster 3 | -1,19 | 9,16E-05 |
| TGFBI     | cluster 3 | -1,01 | 0,00398  |
| THBD      | cluster 3 | -1,29 | 0,00469  |
| THBS1     | cluster 3 | -1,27 | 0,00351  |
| THBS2     | cluster 3 | -1,5  | 0,00138  |
| TIMP3     | cluster 3 | -1,25 | 0,00547  |
| TLL1      | cluster 3 | -1,41 | 0,02319  |
| TMEM119   | cluster 3 | -1,23 | 0,01759  |
| TMEM158   | cluster 3 | -2,04 | 0,00314  |
| TMEM2     | cluster 3 | -1,33 | 0,00014  |
| TNFAIP6   | cluster 3 | -2,06 | 6,62E-07 |
| TNFRSF4   | cluster 3 | -1,2  | 0,00655  |
| TNFSF11   | cluster 3 | -1,85 | 0,01323  |
| TPSAB1    | cluster 3 | -1,79 | 0,01056  |
| TWIST1    | cluster 3 | -1,05 | 0,02259  |
| VCAM1     | cluster 3 | -1,38 | 0,00076  |
| VCAN      | cluster 3 | -1,82 | 9,00E-05 |
| VDR       | cluster 3 | -1,02 | 0,01884  |
| WISP1     | cluster 3 | -1,21 | 0,00646  |
| ZFHX4     | cluster 3 | -1,29 | 0,00437  |

**Supplemental Table 3. Genes differentially represented in P-TME vs M-TME of HGSC samples.**

| Gene symbol    | FC(log2)                             |         |
|----------------|--------------------------------------|---------|
|                | M2 <sup>Lo</sup> vs M2 <sup>Hi</sup> | p-value |
| EIF3FP1        | -4,9                                 | 0,01696 |
| POM121L8P      | -4,7                                 | 0,00281 |
| RP11-811J10.1  | -4,3                                 | 0,00033 |
| HMGB1P16       | -4,2                                 | 0,01796 |
| RP11-760D2.7   | -4,1                                 | 0,00447 |
| RP11-351M16.1  | -4,0                                 | 0,03507 |
| RP11-124N3.2   | -3,9                                 | 0,02153 |
| RNA5SP298      | -3,7                                 | 0,01113 |
| KLHL1          | -3,7                                 | 0,00957 |
| OR4N3P         | -3,7                                 | 0,01617 |
| RP11-1112J20.2 | -3,6                                 | 0,02894 |
| CTB-95D12.1    | -3,6                                 | 0,0009  |
| REXO1L1P       | -3,6                                 | 0,03761 |
| IGBP1P4        | -3,5                                 | 0,01045 |
| CASR           | -3,4                                 | 0,00014 |
| CCNB1IP1P2     | -3,4                                 | 0,02481 |
| RP5-857K21.4   | -3,4                                 | 0,0063  |
| AC079466.1     | -3,4                                 | 0,00935 |
| RP11-111M22.3  | -3,4                                 | 0,00566 |
| FKBP4P1        | -3,3                                 | 0,00116 |
| EIF4E1B        | -3,3                                 | 0,01698 |
| RP6-218J18.2   | -3,3                                 | 0,01505 |
| CRYGB          | -3,3                                 | 0,00657 |
| WDR87          | -3,3                                 | 0,00848 |
| SERPINB3       | -3,2                                 | 0,0113  |
| AC139099.3     | -3,2                                 | 0,04408 |
| MAGEA10        | -3,1                                 | 0,00755 |
| JHDM1D-AS1     | -3,1                                 | 0,00154 |
| C10orf40       | -3,1                                 | 0,02667 |
| IGLV8OR8-1     | -3,1                                 | 0,014   |
| IGHV3-20       | -3,1                                 | 0,0109  |
| HLA-V          | -3,1                                 | 0,00016 |
| SERPINA3       | -3,1                                 | 0,01632 |
| RP11-396M11.1  | -3,1                                 | 0,00488 |
| TDRD12         | -3,1                                 | 0,00013 |
| RP1-5O6.4      | -3,1                                 | 0,03353 |
| RN7SL396P      | -3,0                                 | 0,00689 |
| NUPR1L         | -3,0                                 | 0,004   |
| LINC00668      | -3,0                                 | 0,04185 |
| DYNAP          | -3,0                                 | 0,01248 |

|               |      |         |
|---------------|------|---------|
| AL589739.1    | -3,0 | 0,03472 |
| PSPC1P1       | -3,0 | 0,00139 |
| TOMM5         | -3,0 | 0,00136 |
| MIR135A2      | -2,9 | 0,03276 |
| RN7SKP9       | -2,9 | 0,00015 |
| PRSS33        | -2,9 | 0,00091 |
| NRSN1         | -2,9 | 0,00594 |
| ITGB6         | -2,8 | 0,00028 |
| TMCO5A        | -2,8 | 0,02781 |
| OR8G3P        | -2,8 | 0,01592 |
| ZBTB20-AS4    | -2,8 | 0,00161 |
| RP11-553P9.1  | -2,8 | 0,00042 |
| AADACL3       | -2,8 | 0,04436 |
| ANKRD34B      | -2,8 | 0,00088 |
| CHL1-AS1      | -2,7 | 0,02726 |
| RP11-553L6.2  | -2,7 | 0,01346 |
| ST13P19       | -2,7 | 0,0262  |
| CTD-2015B23.2 | -2,7 | 0,01165 |
| RP11-479G22.8 | -2,7 | 0,04624 |
| RP11-122A21.2 | -2,7 | 0,02486 |
| AC010468.1    | -2,7 | 0,03998 |
| MEIS1-AS2     | -2,7 | 0,0427  |
| RNA5SP141     | -2,7 | 0,00012 |
| RNU6ATAC      | -2,7 | 0,02364 |
| AP000998.2    | -2,6 | 0,04175 |
| SPERT         | -2,6 | 0,00066 |
| AC080125.1    | -2,6 | 0,00323 |
| CTD-2375G15.1 | -2,6 | 0,00564 |
| RP11-758M4.4  | -2,6 | 0,03038 |
| Z73979.1      | -2,6 | 0,0019  |
| CHDC2         | -2,6 | 0,00751 |
| RP11-355F16.1 | -2,6 | 0,00927 |
| PRSS55        | -2,6 | 0,00348 |
| SUB1P4        | -2,6 | 0,04764 |
| RN7SKP80      | -2,6 | 0,03093 |
| PI3           | -2,5 | 0,00999 |
| RP11-141M3.5  | -2,5 | 0,03778 |
| CRYGC         | -2,5 | 0,03868 |
| CXorf30       | -2,5 | 0,0102  |
| RP11-514P8.8  | -2,5 | 0,01308 |
| ENHO          | -2,5 | 0,02794 |
| RP3-462E2.5   | -2,5 | 0,02423 |
| RP11-248B24.4 | -2,5 | 0,03885 |

|               |      |         |
|---------------|------|---------|
| RP11-77P16.4  | -2,5 | 0,00699 |
| FBXO10        | -2,5 | 0,0231  |
| MIA           | -2,5 | 0,00381 |
| ZBBX          | -2,5 | 0,00738 |
| RP11-383C5.3  | -2,4 | 0,01822 |
| RP11-760H22.2 | -2,4 | 0,01244 |
| FABP6         | -2,4 | 0,01092 |
| RP1-34B20.4   | -2,4 | 0,0084  |
| IGLV4-69      | -2,4 | 0,00614 |
| RP11-820K3.4  | -2,4 | 0,02229 |
| RN7SL752P     | -2,4 | 0,01382 |
| C7orf65       | -2,3 | 0,03773 |
| RPL23AP81     | -2,3 | 0,02467 |
| OSER1-AS1     | -2,3 | 0,00765 |
| GABBR2        | -2,3 | 0,02669 |
| SCNN1G        | -2,3 | 0,00465 |
| RP11-820L6.1  | -2,3 | 0,01519 |
| SMC5-AS1      | -2,3 | 0,01347 |
| CWH43         | -2,3 | 0,01322 |
| RNA5SP357     | -2,3 | 0,01138 |
| TRPC7         | -2,3 | 0,03458 |
| SCGB1A1       | -2,3 | 0,03041 |
| RN7SKP255     | -2,3 | 0,00624 |
| RP11-517I3.1  | -2,3 | 0,01981 |
| RNU5B-1       | -2,3 | 0,00239 |
| GBP7          | -2,3 | 0,00486 |
| AC004257.3    | -2,3 | 0,01408 |
| IGLV3-19      | -2,2 | 0,01071 |
| RP11-354I13.1 | -2,2 | 0,01675 |
| CXorf22       | -2,2 | 0,01396 |
| AL133373.1    | -2,2 | 0,00582 |
| EPB41L4A-AS1  | -2,2 | 0,008   |
| CTD-2085J24.4 | -2,2 | 0,02021 |
| PTH2R         | -2,2 | 0,00735 |
| IGLV9-49      | -2,2 | 0,02243 |
| RP4-802A10.1  | -2,2 | 0,03627 |
| RP1-278E11.3  | -2,2 | 0,04189 |
| Y_RNA         | -2,2 | 0,01408 |
| PLEKHS1       | -2,2 | 0,00422 |
| RP1-224A6.8   | -2,2 | 0,01179 |
| LINC00176     | -2,2 | 0,00654 |
| NF1P4         | -2,2 | 0,03206 |
| LARP1P1       | -2,1 | 0,02516 |

|               |      |         |
|---------------|------|---------|
| TRBV5-7       | -2,1 | 0,00145 |
| C5orf17       | -2,1 | 0,03861 |
| MIR205HG      | -2,1 | 0,0331  |
| RP11-77K12.5  | -2,1 | 0,02414 |
| PATE3         | -2,1 | 0,00101 |
| RP11-762I7.4  | -2,1 | 0,03989 |
| RN7SL670P     | -2,1 | 0,03654 |
| A2ML1         | -2,1 | 0,00043 |
| AC097381.1    | -2,1 | 0,0184  |
| MIR4442       | -2,1 | 0,0492  |
| MTRNR2L10     | -2,1 | 0,00398 |
| C19orf73      | -2,1 | 0,0252  |
| RN7SKP70      | -2,1 | 0,0451  |
| DDTL          | -2,1 | 0,00356 |
| MUSTN1        | -2,1 | 0,0304  |
| RP5-1085F17.3 | -2,1 | 0,00869 |
| WFDC6         | -2,1 | 0,01277 |
| KRT16         | -2,1 | 0,00664 |
| RP5-1120P11.4 | -2,0 | 0,00821 |
| RNU5A-1       | -2,0 | 0,00212 |
| EPPIN         | -2,0 | 0,0061  |
| AC079949.1    | -2,0 | 0,01886 |
| GS1-251I9.4   | -2,0 | 0,00655 |
| ARHGAP8       | -2,0 | 0,01262 |
| TFAP2A        | -2,0 | 0,00094 |
| PCAT7         | -2,0 | 0,02214 |
| RP11-255L13.1 | -2,0 | 0,01504 |
| RP11-641D5.2  | -2,0 | 0,02453 |
| RNA5SP145     | -2,0 | 0,00549 |
| RN7SL674P     | -2,0 | 0,03099 |
| CTB-175P5.4   | -2,0 | 0,02376 |
| PATE1         | -2,0 | 0,00667 |
| C19orf33      | -2,0 | 0,00369 |
| RP4-742J24.2  | -2,0 | 0,03167 |
| RP11-421L21.3 | -2,0 | 0,04946 |
| LIPJ          | -2,0 | 0,00926 |
| CTD-2373J19.1 | -2,0 | 0,04349 |
| CRLF1         | -2,0 | 0,00735 |
| SNORA74       | -2,0 | 0,00274 |
| RP11-441O15.3 | -2,0 | 0,03613 |
| STXBP6        | -1,9 | 0,00327 |
| RP11-285F7.2  | -1,9 | 0,04801 |
| OR6J1         | -1,9 | 0,02063 |

|               |      |         |
|---------------|------|---------|
| TRAM2-AS1     | -1,9 | 0,02828 |
| SERPIN5       | -1,9 | 0,01081 |
| RP11-419L20.2 | -1,9 | 0,03998 |
| PTPRG-AS1     | -1,9 | 0,00543 |
| RP11-219B4.5  | -1,9 | 0,01929 |
| NXNL2         | -1,9 | 0,0002  |
| AC069547.1    | -1,9 | 0,04574 |
| TMPRSS15      | -1,9 | 0,01541 |
| RNU12         | -1,9 | 0,03754 |
| LDHC          | -1,9 | 0,01704 |
| KRT14         | -1,9 | 0,04852 |
| FAT2          | -1,9 | 0,0041  |
| JMJD1C-AS1    | -1,9 | 0,04426 |
| CTA-221G9.11  | -1,9 | 0,02357 |
| ASNSP5        | -1,9 | 0,02187 |
| RP11-98L12.2  | -1,8 | 0,04832 |
| SRMS          | -1,8 | 0,00673 |
| TCF24         | -1,8 | 0,01199 |
| RP11-747H7.3  | -1,8 | 0,01784 |
| PTPRT         | -1,8 | 0,03965 |
| CTD-3018O17.3 | -1,8 | 0,00644 |
| KB-431C1.5    | -1,8 | 0,0266  |
| IGLV3-9       | -1,8 | 0,03476 |
| TRBV21-1      | -1,8 | 0,00155 |
| MFSD3         | -1,8 | 0,00033 |
| SPDYE8P       | -1,8 | 0,0205  |
| GRIA2         | -1,8 | 0,03998 |
| RP11-58A17.3  | -1,8 | 0,04261 |
| CHODL         | -1,8 | 0,001   |
| FAM83F        | -1,8 | 0,04336 |
| DIRAS2        | -1,8 | 0,02577 |
| AC016739.2    | -1,8 | 0,03357 |
| LINC00883     | -1,8 | 0,03384 |
| MDFI          | -1,8 | 0,01123 |
| RN7SKP203     | -1,8 | 0,0216  |
| AF186192.1    | -1,8 | 0,01288 |
| CHST4         | -1,8 | 0,00098 |
| NAPRT1        | -1,8 | 0,00307 |
| SNHG6         | -1,8 | 0,00026 |
| ASB15         | -1,8 | 0,03854 |
| VWA3B         | -1,8 | 0,00456 |
| HS6ST1P1      | -1,8 | 0,04275 |
| DKK4          | -1,8 | 0,0252  |

|                       |      |         |
|-----------------------|------|---------|
| NOS1                  | -1,8 | 0,00979 |
| CTC-459F4.3           | -1,8 | 0,01419 |
| FABP9                 | -1,7 | 0,03205 |
| AP000487.5            | -1,7 | 0,02986 |
| CHRNA9                | -1,7 | 0,03001 |
| RPPH1                 | -1,7 | 0,00311 |
| TVP23BP2              | -1,7 | 0,03752 |
| UNC13C                | -1,7 | 0,02553 |
| DRC1                  | -1,7 | 0,00563 |
| MIR550A3              | -1,7 | 0,00305 |
| RP11-289A15.1         | -1,7 | 0,044   |
| CNDP1                 | -1,7 | 0,01493 |
| SNX31                 | -1,7 | 0,01046 |
| SPINT3                | -1,7 | 0,03951 |
| LL22NC03-<br>N14H11.1 | -1,7 | 0,02664 |
| RP11-565F19.2         | -1,7 | 0,00504 |
| PPAN                  | -1,7 | 0,04786 |
| AL161626.1            | -1,7 | 0,0209  |
| PXMP2                 | -1,7 | 0,00276 |
| NR2E3                 | -1,7 | 0,00258 |
| RNA5SP370             | -1,7 | 0,02398 |
| SPDYC                 | -1,7 | 0,0323  |
| SLCO6A1               | -1,7 | 0,01427 |
| RP11-22C11.1          | -1,7 | 0,03296 |
| ZNF205-AS1            | -1,7 | 0,02998 |
| RN7SL3                | -1,7 | 0,01195 |
| HES2                  | -1,7 | 0,00241 |
| GLRA2                 | -1,7 | 0,02158 |
| STAC2                 | -1,6 | 0,03399 |
| HKDC1                 | -1,6 | 0,0178  |
| NPAP1                 | -1,6 | 0,03982 |
| OR52B1P               | -1,6 | 0,0146  |
| ANKRD65               | -1,6 | 0,03396 |
| TRBV6-9               | -1,6 | 0,03378 |
| SLC38A3               | -1,6 | 0,02979 |
| ATP5EP2               | -1,6 | 0,04998 |
| RP11-563H6.1          | -1,6 | 0,0334  |
| ANKRD7                | -1,6 | 0,00867 |
| PKP3                  | -1,6 | 0,03579 |
| CTD-2328D6.1          | -1,6 | 0,0107  |
| OR1J2                 | -1,6 | 0,01474 |
| MSLN                  | -1,6 | 0,01306 |

|               |      |         |
|---------------|------|---------|
| PPP1R42       | -1,6 | 0,00893 |
| MYT1L         | -1,6 | 0,04364 |
| CTB-131K11.1  | -1,5 | 0,04209 |
| FAM83E        | -1,5 | 0,00085 |
| RP11-36C20.1  | -1,5 | 0,01066 |
| AC019206.1    | -1,5 | 0,03339 |
| RP11-100N21.1 | -1,5 | 0,04494 |
| KIAA0087      | -1,5 | 0,01954 |
| CTD-2196E14.9 | -1,5 | 0,00441 |
| PATE4         | -1,5 | 0,00962 |
| LINC01057     | -1,5 | 0,01682 |
| RP11-494M8.4  | -1,5 | 0,0087  |
| RPL5P12       | -1,5 | 0,01532 |
| KLK5          | -1,5 | 0,03098 |
| KLK13         | -1,5 | 0,01801 |
| SERBP1P1      | -1,5 | 0,04712 |
| C22orf15      | -1,5 | 0,00344 |
| CATSPERB      | -1,5 | 0,00786 |
| RP11-498C9.15 | -1,5 | 0,04778 |
| PITX1         | -1,5 | 0,02594 |
| DCDC2         | -1,5 | 0,02254 |
| MIR563        | -1,5 | 0,00483 |
| PPP5D1        | -1,5 | 0,00724 |
| WFDC8         | -1,5 | 0,04432 |
| CBLC          | -1,4 | 0,01376 |
| TMC4          | -1,4 | 0,00227 |
| KLK8          | -1,4 | 0,00212 |
| CLDN3         | -1,4 | 0,01038 |
| RPL8          | -1,4 | 0,0017  |
| NT5M          | -1,4 | 0,00242 |
| GCAT          | -1,4 | 0,00771 |
| PROM1         | -1,4 | 0,04968 |
| TRIM73        | -1,4 | 0,00591 |
| AC133041.1    | -1,4 | 0,04665 |
| ASF1B         | -1,4 | 0,00115 |
| KB-1589B1.4   | -1,4 | 0,00882 |
| CLCA4         | -1,4 | 0,01198 |
| LIMK2         | -1,4 | 0,0006  |
| ESPN          | -1,4 | 0,01465 |
| RP11-120B7.1  | -1,4 | 0,03387 |
| SPON1         | -1,4 | 0,00431 |
| WFDC2         | -1,4 | 0,0151  |
| RP11-239L20.3 | -1,4 | 0,0234  |



|               |      |         |
|---------------|------|---------|
| DNAL4         | -1,4 | 0,00315 |
| RP11-282K24.3 | -1,4 | 0,0451  |
| PLSCR2        | -1,4 | 0,00566 |
| SLC7A9        | -1,4 | 0,00766 |
| EYA2          | -1,4 | 0,00784 |
| BCAM          | -1,4 | 0,00905 |
| RNA5-8SP6     | -1,4 | 0,0162  |
| ALKBH7        | -1,4 | 0,00656 |
| KRT15         | -1,3 | 0,0474  |
| SFN           | -1,3 | 0,0445  |
| SYNE4         | -1,3 | 0,00845 |
| TMEM238       | -1,3 | 0,00764 |
| RP11-53O19.3  | -1,3 | 0,0437  |
| ABCA12        | -1,3 | 0,002   |
| MTL5          | -1,3 | 0,00127 |
| XK            | -1,3 | 0,01773 |
| CCDC54        | -1,3 | 0,02737 |
| CEACAM16      | -1,3 | 0,01072 |
| ALKBH6        | -1,3 | 0,0173  |
| UNC5A         | -1,3 | 0,03278 |
| NDST3         | -1,3 | 0,0279  |
| CTC-228N24.3  | -1,3 | 0,04605 |
| KLC3          | -1,3 | 0,01782 |
| LRIG1         | -1,3 | 0,01077 |
| C6orf52       | -1,3 | 0,01821 |
| SMIM22        | -1,3 | 0,00889 |
| CYP51A1       | -1,3 | 0,0412  |
| STON2         | -1,3 | 0,0002  |
| TRAPPC6A      | -1,3 | 0,00588 |
| BCAT1         | -1,3 | 0,04258 |
| CYC1          | -1,3 | 0,00191 |
| RN7SK         | -1,3 | 0,00419 |
| RP5-890O15.3  | -1,3 | 0,04513 |
| PNOC          | -1,3 | 0,01221 |
| ARHGAP39      | -1,3 | 0,00074 |
| ELF3          | -1,3 | 0,00574 |
| EEF1A1P11     | -1,3 | 0,00531 |
| PRR15         | -1,3 | 0,04158 |
| ZGPAT         | -1,3 | 0,02294 |
| HSF1          | -1,3 | 0,00504 |
| AF186192.5    | -1,3 | 0,02125 |
| ENKUR         | -1,3 | 0,02722 |
| PAX8-AS1      | -1,3 | 0,03487 |

|               |      |         |
|---------------|------|---------|
| SLC52A2       | -1,2 | 0,00312 |
| RP11-146N23.1 | -1,2 | 0,00758 |
| OVGP1         | -1,2 | 0,02114 |
| WFDC3         | -1,2 | 0,03721 |
| ZBTB46        | -1,2 | 0,00494 |
| RP11-350G8.3  | -1,2 | 0,00445 |
| KLK6          | -1,2 | 0,01414 |
| RGL3          | -1,2 | 0,01464 |
| CHRNE         | -1,2 | 0,00138 |
| CTD-2114J12.1 | -1,2 | 0,04246 |
| TPTE2P1       | -1,2 | 0,0365  |
| FCN3          | -1,2 | 0,02948 |
| RPS2P7        | -1,2 | 0,01022 |
| RAB4B         | -1,2 | 0,00536 |
| GAPDHS        | -1,2 | 0,00942 |
| CHST6         | -1,2 | 0,02976 |
| SNORD1B       | -1,2 | 0,01063 |
| ALG1L2        | -1,2 | 0,04559 |
| S100A13       | -1,2 | 0,0016  |
| RPLP0P6       | -1,2 | 0,00868 |
| ST6GALNAC2    | -1,2 | 0,01073 |
| BIK           | -1,2 | 0,01058 |
| ST13P3        | -1,2 | 0,02052 |
| SLPI          | -1,2 | 0,04005 |
| FZD3          | -1,2 | 0,0143  |
| RP11-395P16.1 | -1,2 | 0,00226 |
| MIR591        | -1,2 | 0,00595 |
| NPR1          | -1,2 | 0,00671 |
| NPEPL1        | -1,2 | 0,02744 |
| CTC-236F12.4  | -1,2 | 0,01098 |
| EPB41L4A-AS2  | -1,2 | 0,00302 |
| C8orf47       | -1,2 | 0,03536 |
| RIPK4         | -1,2 | 0,00886 |
| SCGB2B3P      | -1,2 | 0,04443 |
| RP11-43D2.2   | -1,2 | 0,00692 |
| RP5-1092A3.4  | -1,2 | 0,02824 |
| NAT14         | -1,2 | 0,03514 |
| HFE2          | -1,2 | 0,03074 |
| DEPDC1        | -1,2 | 0,02551 |
| CDT1          | -1,2 | 0,03084 |
| AL590822.1    | -1,2 | 0,03721 |
| FCF1P3        | -1,2 | 0,02243 |
| PARP10        | -1,2 | 0,00906 |

|              |      |         |
|--------------|------|---------|
| LRRIQ3       | -1,2 | 0,02234 |
| FAM83H       | -1,2 | 0,02072 |
| TOMM22       | -1,2 | 0,00697 |
| WDR96        | -1,2 | 0,03615 |
| RP11-31F15.2 | -1,2 | 0,01799 |
| CBY3         | -1,2 | 0,0301  |
| FBXL6        | -1,2 | 0,00921 |
| CAPS         | -1,2 | 0,00944 |
| PIPOX        | -1,2 | 0,02031 |
| TTC22        | -1,2 | 0,01231 |
| EVPL         | -1,1 | 0,013   |
| PRKAA2       | -1,1 | 0,03914 |
| ALS2CR11     | -1,1 | 0,01338 |
| BTG3         | -1,1 | 0,00036 |
| SBF2-AS1     | -1,1 | 0,03668 |
| KLK10        | -1,1 | 0,00914 |
| CTC-471J1.10 | -1,1 | 0,00587 |
| RP11-314D7.2 | -1,1 | 0,02744 |
| PPIAP31      | -1,1 | 0,0288  |
| MVD          | -1,1 | 0,01772 |
| KIFC2        | -1,1 | 0,00724 |
| AC104695.3   | -1,1 | 0,04029 |
| HIST1H4A     | -1,1 | 0,0078  |
| PRRG4        | -1,1 | 0,03569 |
| RP11-277A4.4 | -1,1 | 0,02629 |
| ALK          | -1,1 | 0,03781 |
| THSD4        | -1,1 | 0,00608 |
| RSPH1        | -1,1 | 0,04433 |
| PELI2        | -1,1 | 0,00371 |
| PTMAP5       | -1,1 | 0,00145 |
| SNORD46      | -1,1 | 0,04226 |
| CCDC60       | -1,1 | 0,04737 |
| SERBP1P5     | -1,1 | 0,03809 |
| SGK2         | -1,1 | 0,04158 |
| FBXO16       | -1,1 | 0,01883 |
| SCARNA23     | -1,1 | 0,01749 |
| BOP1         | -1,1 | 0,01295 |
| RPL30        | -1,1 | 0,01382 |
| MISP         | -1,1 | 0,01346 |
| MYH16        | -1,1 | 0,00968 |
| CELSR2       | -1,1 | 0,00361 |
| RP11-299J3.6 | -1,1 | 0,01181 |
| DBNDD1       | -1,1 | 0,03381 |

|               |      |         |
|---------------|------|---------|
| ADAM32        | -1,1 | 0,00732 |
| CCDC6         | -1,1 | 0,0036  |
| RPL7P23       | -1,1 | 0,00353 |
| PTBP1P        | -1,1 | 0,04554 |
| TRBV4-2       | -1,1 | 0,04823 |
| TST           | -1,1 | 0,01951 |
| RHBDD3        | -1,1 | 0,00891 |
| AL161915.1    | -1,1 | 0,03133 |
| SCARNA8       | -1,1 | 0,02851 |
| CARD10        | -1,1 | 0,02714 |
| TTC4          | -1,1 | 0,04899 |
| BAIAP2L2      | -1,1 | 0,0056  |
| ZBTB8A        | -1,1 | 0,03176 |
| LRRC61        | -1,1 | 0,04104 |
| CYHR1         | -1,1 | 0,00129 |
| AC007228.9    | -1,1 | 0,0155  |
| KLK7          | -1,1 | 0,04336 |
| ZNF581        | -1,1 | 0,00456 |
| RASSF9        | -1,1 | 0,00512 |
| TONSL         | -1,1 | 0,01832 |
| ECSIT         | -1,1 | 0,01281 |
| C9orf16       | -1,0 | 0,03009 |
| EPS8L2        | -1,0 | 0,00285 |
| PGM2L1        | -1,0 | 0,02402 |
| SLC9A3R2      | -1,0 | 0,00443 |
| BBOX1         | -1,0 | 0,03904 |
| AC023590.1    | -1,0 | 0,00555 |
| EXOSC4        | -1,0 | 0,02108 |
| CHCHD10       | -1,0 | 0,00379 |
| FAM203A       | -1,0 | 0,03785 |
| SORD          | -1,0 | 0,046   |
| RCC1          | -1,0 | 0,01237 |
| RP11-114H24.4 | -1,0 | 0,03049 |
| YIPF2         | -1,0 | 0,00803 |
| GADD45GIP1    | -1,0 | 0,03488 |
| RASSF7        | -1,0 | 0,00288 |
| PROSER2       | -1,0 | 0,03045 |
| SNORA5C       | -1,0 | 0,01355 |
| CASC7         | -1,0 | 0,04475 |
| NUDT16L1      | -1,0 | 0,0225  |
| CD320         | -1,0 | 0,02984 |
| C8orf33       | -1,0 | 0,00344 |
| MIR1284       | -1,0 | 0,02363 |

|                |      |         |
|----------------|------|---------|
| RN7SL1         | -1,0 | 0,03946 |
| TSPO           | -1,0 | 0,00708 |
| RP11-184I16.3  | -1,0 | 0,02796 |
| TBC1D10A       | -1,0 | 0,01304 |
| ANO7P1         | -1,0 | 0,03508 |
| APRT           | -1,0 | 0,01194 |
| LINC00657      | -1,0 | 0,00337 |
| HS6ST1         | -1,0 | 0,0382  |
| FAM109B        | -1,0 | 0,0312  |
| P2RY2          | -1,0 | 0,04281 |
| C1QC           | 1,0  | 0,01744 |
| PLA2G4C        | 1,0  | 0,02784 |
| ZNF804A        | 1,0  | 0,02554 |
| ARHGAP23P1     | 1,0  | 0,015   |
| MPEG1          | 1,0  | 0,03434 |
| CD53           | 1,0  | 0,02702 |
| CD33           | 1,0  | 0,02692 |
| MUC6           | 1,0  | 0,01059 |
| IQGAP2         | 1,0  | 0,0053  |
| ADORA2A-AS1    | 1,0  | 0,02872 |
| AOAH           | 1,0  | 0,03926 |
| FBP1           | 1,0  | 0,03617 |
| RDH12          | 1,0  | 0,01151 |
| PDZRN4         | 1,0  | 0,02388 |
| PRDM8          | 1,1  | 0,0499  |
| PAICSP1        | 1,1  | 0,04639 |
| PARM1          | 1,1  | 0,03452 |
| RP11-1260E13.4 | 1,1  | 0,0491  |
| GPNMB          | 1,1  | 0,04347 |
| NELL2          | 1,1  | 0,01794 |
| JAKMIP1        | 1,1  | 0,00933 |
| AC064850.4     | 1,1  | 0,04854 |
| MRGPRF         | 1,1  | 0,04122 |
| LRP4           | 1,1  | 0,04882 |
| NCAM1          | 1,1  | 0,04779 |
| C1QB           | 1,1  | 0,00957 |
| MORF4L1P5      | 1,1  | 0,04267 |
| RAC2           | 1,1  | 0,01672 |
| EMBP1          | 1,1  | 0,02683 |
| SPARCL1        | 1,1  | 0,03985 |
| USP50          | 1,1  | 0,03866 |
| ITGAL          | 1,1  | 0,03627 |
| PTPRC          | 1,1  | 0,04701 |

|               |     |         |
|---------------|-----|---------|
| PBX4          | 1,1 | 0,02371 |
| CST7          | 1,1 | 0,0132  |
| LARP4P        | 1,1 | 0,00627 |
| TOX4P1        | 1,1 | 0,04854 |
| COLGALT2      | 1,1 | 0,02634 |
| LPPR4         | 1,1 | 0,01985 |
| EFEMP1        | 1,1 | 0,04605 |
| CD247         | 1,1 | 0,02002 |
| RP11-267J23.4 | 1,1 | 0,02906 |
| AC092653.5    | 1,1 | 0,00648 |
| FADS2         | 1,1 | 0,00871 |
| LYZ           | 1,1 | 0,04327 |
| RBMXL3        | 1,1 | 0,01695 |
| ESRRB         | 1,1 | 0,00528 |
| UBASH3A       | 1,1 | 0,03153 |
| FCRL6         | 1,1 | 0,03348 |
| CD2           | 1,1 | 0,02734 |
| EYA1          | 1,1 | 0,03567 |
| FGR           | 1,1 | 0,03199 |
| GIMAP5        | 1,1 | 0,01328 |
| KLHL10        | 1,1 | 0,0327  |
| ACHE          | 1,1 | 0,03815 |
| CD3D          | 1,1 | 0,04316 |
| EGFL6         | 1,2 | 0,00372 |
| CD200R1       | 1,2 | 0,02751 |
| C7orf71       | 1,2 | 0,02252 |
| SIGLEC14      | 1,2 | 0,03692 |
| PCDHGB1       | 1,2 | 0,01784 |
| GPR171        | 1,2 | 0,04875 |
| PHF5CP        | 1,2 | 0,02515 |
| CCL5          | 1,2 | 0,04219 |
| AK4P1         | 1,2 | 0,02327 |
| RP11-290F20.3 | 1,2 | 0,03688 |
| FAIM2         | 1,2 | 0,01875 |
| GDPD4         | 1,2 | 0,04455 |
| TRBC2         | 1,2 | 0,02712 |
| ANO4          | 1,2 | 0,03281 |
| SIGLEC11      | 1,2 | 0,03377 |
| TTC24         | 1,2 | 0,04104 |
| DACT2         | 1,2 | 0,04535 |
| JAKMIP3       | 1,2 | 0,01645 |
| ASB2          | 1,2 | 0,00291 |
| CAMK4         | 1,2 | 0,02674 |

|               |     |         |
|---------------|-----|---------|
| KLRD1         | 1,2 | 0,0345  |
| CTD-2179L22.1 | 1,2 | 0,02191 |
| RP11-503K16.2 | 1,2 | 0,01568 |
| CHRNA2        | 1,2 | 0,00162 |
| HLA-G         | 1,2 | 0,02759 |
| CD3E          | 1,2 | 0,02828 |
| CTD-2501B8.5  | 1,2 | 0,04199 |
| CHD5          | 1,2 | 0,04046 |
| CTC-303L1.1   | 1,2 | 0,00886 |
| CD3G          | 1,2 | 0,03432 |
| CCR7          | 1,2 | 0,04983 |
| SLFN14        | 1,2 | 0,03673 |
| CNTN4         | 1,2 | 0,00621 |
| LINGO3        | 1,2 | 0,0445  |
| NCF1          | 1,2 | 0,00666 |
| CLDN1         | 1,2 | 0,02619 |
| TRAJ10        | 1,2 | 0,0353  |
| PLA2G7        | 1,2 | 0,01164 |
| TBX21         | 1,2 | 0,02765 |
| CCDC178       | 1,2 | 0,02176 |
| ITK           | 1,3 | 0,03682 |
| SELL          | 1,3 | 0,03577 |
| RP11-819M15.1 | 1,3 | 0,01981 |
| CMKLR1        | 1,3 | 0,01018 |
| SP140         | 1,3 | 0,02773 |
| SPRED3        | 1,3 | 0,02412 |
| ADAMDEC1      | 1,3 | 0,04103 |
| NLRP9         | 1,3 | 0,02926 |
| FBXO40        | 1,3 | 0,03805 |
| SLAMF6        | 1,3 | 0,02823 |
| S100A3        | 1,3 | 0,02581 |
| NMUR1         | 1,3 | 0,0374  |
| LPAL2         | 1,3 | 0,00297 |
| CHRNA7        | 1,3 | 0,02589 |
| COL6A5        | 1,3 | 0,02458 |
| KIF17         | 1,3 | 0,02196 |
| VSIG2         | 1,3 | 0,0244  |
| BCL11B        | 1,3 | 0,02516 |
| LILRA6        | 1,3 | 0,01629 |
| C9orf139      | 1,3 | 0,02303 |
| PLA2G2C       | 1,3 | 0,04327 |
| TNMD          | 1,3 | 0,03761 |
| IL18RAP       | 1,3 | 0,01646 |

|               |     |         |
|---------------|-----|---------|
| SIGLEC8       | 1,3 | 0,03095 |
| NCF1B         | 1,3 | 0,0116  |
| KIF19         | 1,3 | 0,01801 |
| GRIN1         | 1,3 | 0,03295 |
| CCDC116       | 1,3 | 0,03006 |
| GIMAP7        | 1,3 | 0,0058  |
| HADHAP1       | 1,3 | 0,0313  |
| CTBP2P8       | 1,3 | 0,01222 |
| AMH           | 1,3 | 0,03331 |
| RP11-359B20.1 | 1,3 | 0,01211 |
| PCYT1B        | 1,3 | 0,01674 |
| XPNPEP2       | 1,3 | 0,04593 |
| LILRA4        | 1,3 | 0,03878 |
| PYHIN1        | 1,3 | 0,02663 |
| CDH4          | 1,3 | 0,037   |
| RHOXF1        | 1,3 | 0,00901 |
| NCF1C         | 1,4 | 0,00993 |
| GFRA1         | 1,4 | 0,02231 |
| PAMR1         | 1,4 | 0,01971 |
| APLP1         | 1,4 | 0,01879 |
| IL17REL       | 1,4 | 0,04112 |
| TRGV1         | 1,4 | 0,03425 |
| CD96          | 1,4 | 0,02746 |
| GZMA          | 1,4 | 0,03669 |
| BAI1          | 1,4 | 0,02018 |
| GOLGA5P1      | 1,4 | 0,01198 |
| PPEF2         | 1,4 | 0,0163  |
| RPS24         | 1,4 | 0,03627 |
| TRAV23DV6     | 1,4 | 0,03287 |
| TRABD2B       | 1,4 | 0,00633 |
| GRAP2         | 1,4 | 0,00932 |
| TRGV8         | 1,4 | 0,03577 |
| PLA2G2D       | 1,4 | 0,0313  |
| MYH1          | 1,4 | 0,03179 |
| GRIN3A        | 1,4 | 0,03315 |
| ZAP70         | 1,4 | 0,00519 |
| AC005034.3    | 1,4 | 0,04194 |
| SCML4         | 1,4 | 0,01713 |
| RP11-312O7.2  | 1,4 | 0,03809 |
| SIRPB1        | 1,4 | 0,00851 |
| MIR380        | 1,4 | 0,04209 |
| FOLR2         | 1,4 | 0,01459 |
| TRAJ36        | 1,4 | 0,02762 |



|              |     |         |
|--------------|-----|---------|
| KCNA5        | 1,4 | 0,02342 |
| CTC-471F3.5  | 1,4 | 0,0099  |
| SLC12A5      | 1,4 | 0,01794 |
| SPATC1       | 1,4 | 0,02126 |
| COCH         | 1,4 | 0,02525 |
| ALDH1A2      | 1,4 | 0,01052 |
| GNLY         | 1,4 | 0,02659 |
| C16orf93     | 1,4 | 0,00907 |
| MAGED4       | 1,4 | 0,03983 |
| RP13-39P12.2 | 1,5 | 0,02464 |
| RP4-775C13.1 | 1,5 | 0,01223 |
| TRAV14DV4    | 1,5 | 0,01644 |
| KLRC2        | 1,5 | 0,04112 |
| RNF17        | 1,5 | 0,03382 |
| OR11H7       | 1,5 | 0,02538 |
| ASIC4        | 1,5 | 0,01245 |
| FAM159A      | 1,5 | 0,00768 |
| MYOM3        | 1,5 | 0,03487 |
| LGALS8-AS1   | 1,5 | 0,03135 |
| RP11-30B1.1  | 1,5 | 0,02498 |
| TRAV13-1     | 1,5 | 0,03309 |
| IRGM         | 1,5 | 0,00824 |
| CNTN6        | 1,5 | 0,01241 |
| MRC1L1       | 1,5 | 0,04413 |
| ST13P5       | 1,5 | 0,01471 |
| LAMC3        | 1,5 | 0,04419 |
| PRF1         | 1,5 | 0,00806 |
| MUC12        | 1,5 | 0,01223 |
| AJAP1        | 1,5 | 0,04518 |
| TRAV26-1     | 1,5 | 0,02391 |
| ZCCHC18      | 1,5 | 8,3E-05 |
| IGKV1-27     | 1,5 | 0,04445 |
| GRM4         | 1,5 | 0,02558 |
| CACNG1       | 1,5 | 0,03147 |
| HSD3B1       | 1,5 | 0,02505 |
| OR11H4       | 1,5 | 0,00154 |
| MIR544A      | 1,5 | 0,01611 |
| FLG          | 1,5 | 0,02823 |
| CCR9         | 1,5 | 0,00945 |
| FAIM3        | 1,5 | 0,03137 |
| OR2D3        | 1,5 | 0,03711 |
| TRAV38-2DV8  | 1,5 | 0,02782 |
| ACSBG1       | 1,5 | 0,04386 |

|              |     |         |
|--------------|-----|---------|
| C9           | 1,5 | 0,0456  |
| CRTAM        | 1,5 | 0,01701 |
| DNAJC5B      | 1,5 | 0,00793 |
| SCUBE1       | 1,5 | 0,02213 |
| HDAC1P2      | 1,5 | 0,03108 |
| GPC3         | 1,5 | 0,01617 |
| GOLGA8K      | 1,5 | 0,04802 |
| SLC7A10      | 1,5 | 0,0378  |
| FASLG        | 1,5 | 0,02463 |
| MARCO        | 1,5 | 0,0205  |
| TRBV3-1      | 1,5 | 0,02265 |
| RP5-874C20.6 | 1,6 | 0,02015 |
| DOC2B        | 1,6 | 0,00516 |
| GZMK         | 1,6 | 0,03055 |
| OR51E2       | 1,6 | 0,03937 |
| RHBDL3       | 1,6 | 0,01477 |
| TRAV8-6      | 1,6 | 0,03145 |
| TRGV5P       | 1,6 | 0,01318 |
| RPL7P18      | 1,6 | 0,0491  |
| MASP1        | 1,6 | 0,00873 |
| TRAV2        | 1,6 | 0,03936 |
| CXorf65      | 1,6 | 0,0243  |
| TRAV12-3     | 1,6 | 0,02349 |
| CPZ          | 1,6 | 0,04947 |
| AIRE         | 1,6 | 0,02143 |
| DKK1         | 1,6 | 0,04493 |
| GTF2IRD2P1   | 1,6 | 0,0106  |
| ABCC8        | 1,6 | 0,03972 |
| HNRNPA1P2    | 1,6 | 0,01504 |
| AC116562.1   | 1,6 | 0,04442 |
| TRAV8-2      | 1,6 | 0,02186 |
| KIF4CP       | 1,6 | 0,04382 |
| SNORD116-12  | 1,6 | 0,04434 |
| CR2          | 1,6 | 0,03347 |
| GLULP4       | 1,6 | 0,03103 |
| GPR20        | 1,6 | 0,04432 |
| IGHV5-78     | 1,6 | 0,02892 |
| EIF2S2P3     | 1,6 | 0,02241 |
| TIMD4        | 1,6 | 0,02171 |
| SLC25A21     | 1,6 | 0,02962 |
| MIR329-2     | 1,6 | 0,04924 |
| PCDH11X      | 1,6 | 0,00598 |
| ZNF385B      | 1,6 | 0,00266 |

|               |     |         |
|---------------|-----|---------|
| TRAJ50        | 1,6 | 0,01258 |
| CLEC17A       | 1,6 | 0,04762 |
| TRAV12-1      | 1,7 | 0,0488  |
| TRAJ52        | 1,7 | 0,01174 |
| DRAXIN        | 1,7 | 0,03031 |
| CCL26         | 1,7 | 0,02657 |
| LTK           | 1,7 | 0,00018 |
| CDCP2         | 1,7 | 0,00922 |
| RP11-428P16.2 | 1,7 | 0,01515 |
| PENK          | 1,7 | 0,02456 |
| GSTM5         | 1,7 | 0,02568 |
| KIRREL2       | 1,7 | 0,01413 |
| OR13A1        | 1,7 | 0,02788 |
| RNF224        | 1,7 | 0,03248 |
| IGLV3-25      | 1,7 | 0,02586 |
| TUBB8P2       | 1,7 | 0,00479 |
| CD46P1        | 1,7 | 0,02689 |
| OR52K3P       | 1,7 | 0,03726 |
| SNORA18       | 1,7 | 0,04504 |
| ADAMTS19      | 1,7 | 0,00257 |
| GZMH          | 1,7 | 0,00245 |
| SHD           | 1,7 | 0,04586 |
| SYT14L        | 1,7 | 0,03096 |
| RP11-158I9.5  | 1,7 | 0,00468 |
| RP11-1113N2.4 | 1,7 | 0,00689 |
| TRAV17        | 1,7 | 0,00795 |
| EIF5AL1       | 1,8 | 0,02915 |
| PSMA6P2       | 1,8 | 0,02737 |
| HPGD          | 1,8 | 0,02342 |
| CASQ2         | 1,8 | 0,01603 |
| CNTNAP2       | 1,8 | 0,02936 |
| PRSS35        | 1,8 | 0,00481 |
| IGLV2-14      | 1,8 | 0,01917 |
| NPY4R         | 1,8 | 0,00832 |
| TRGV6         | 1,8 | 0,02034 |
| MYH8          | 1,8 | 0,01873 |
| RYR1          | 1,8 | 0,0046  |
| TCHH          | 1,8 | 0,00032 |
| KIR2DL4       | 1,8 | 0,02475 |
| GOLGA8Q       | 1,8 | 0,00594 |
| SPATA31C2     | 1,8 | 0,02034 |
| TRBV2         | 1,8 | 0,04584 |
| IGF2          | 1,8 | 0,023   |

|               |     |         |
|---------------|-----|---------|
| NPHS1         | 1,8 | 0,0445  |
| OR2L2         | 1,8 | 0,01819 |
| AC005014.5    | 1,8 | 0,01455 |
| CHRNA1        | 1,8 | 0,03031 |
| PCDHGA1       | 1,8 | 0,00324 |
| CSF2          | 1,8 | 0,01841 |
| OR10A4        | 1,8 | 0,00743 |
| SLC22A16      | 1,8 | 0,00573 |
| TEX26         | 1,8 | 0,03887 |
| AKR1C4        | 1,8 | 0,01082 |
| SHISA3        | 1,8 | 0,03939 |
| RP3-417G15.1  | 1,8 | 0,04754 |
| SOAT2         | 1,8 | 0,01089 |
| USH1C         | 1,8 | 0,04383 |
| DNASE1L3      | 1,8 | 0,0226  |
| MIR548P       | 1,8 | 0,02725 |
| RP11-766F14.2 | 1,8 | 0,03273 |
| CYP4F22       | 1,9 | 0,01209 |
| MUC22         | 1,9 | 0,02433 |
| CTD-2173L22.4 | 1,9 | 0,02983 |
| IGLV5-45      | 1,9 | 0,02722 |
| RP11-298J20.4 | 1,9 | 0,0445  |
| MIR655        | 1,9 | 0,02794 |
| PSG8          | 1,9 | 0,04162 |
| SNORD114-6    | 1,9 | 0,01571 |
| SCG3          | 1,9 | 0,00685 |
| RP11-150O12.6 | 1,9 | 0,01148 |
| ACTBP14       | 1,9 | 0,04769 |
| LRRC37A11P    | 1,9 | 0,00218 |
| TRAV24        | 1,9 | 0,04221 |
| IL23R         | 1,9 | 0,00137 |
| RP11-619F23.2 | 1,9 | 0,02769 |
| H1FNT         | 1,9 | 0,01677 |
| RP11-367E12.4 | 1,9 | 0,02462 |
| MIR493        | 1,9 | 0,00387 |
| RFX4          | 1,9 | 0,02317 |
| IL27          | 1,9 | 0,03558 |
| TRBJ2-2       | 1,9 | 0,02552 |
| GRIN2B        | 1,9 | 0,00499 |
| C7orf66       | 1,9 | 0,04821 |
| RP11-680F20.6 | 1,9 | 0,00873 |
| SORCS1        | 1,9 | 0,00149 |
| PIWIL1        | 1,9 | 0,02463 |

|               |     |         |
|---------------|-----|---------|
| CTD-2154I11.2 | 1,9 | 0,04982 |
| TREML2        | 1,9 | 0,00461 |
| TRAJ54        | 1,9 | 0,04585 |
| KLHL38        | 1,9 | 0,00417 |
| MIR494        | 1,9 | 0,00543 |
| RPL39P        | 1,9 | 0,04386 |
| RP1-90J20.12  | 2,0 | 0,01672 |
| DKFZP434O1614 | 2,0 | 0,0211  |
| SSTR1         | 2,0 | 0,04715 |
| FLVCR1-AS1    | 2,0 | 0,04288 |
| IL13          | 2,0 | 0,02765 |
| CCL21         | 2,0 | 0,00574 |
| SFTPD         | 2,0 | 0,00135 |
| FGF20         | 2,0 | 0,04238 |
| TRAV21        | 2,0 | 0,00623 |
| HNRNPA1P26    | 2,0 | 0,04933 |
| TRAV8-4       | 2,0 | 0,00783 |
| BRS3          | 2,0 | 0,02653 |
| RNASE8        | 2,0 | 0,00251 |
| TRAJ44        | 2,0 | 0,00453 |
| NCR1          | 2,0 | 0,00123 |
| PSG5          | 2,0 | 0,03652 |
| KCNK10        | 2,0 | 0,04784 |
| RP5-828H9.1   | 2,0 | 0,03068 |
| RP11-807H22.6 | 2,0 | 0,04803 |
| HNRNPA1P42    | 2,0 | 0,03755 |
| TRAJ41        | 2,0 | 0,01236 |
| RIPPLY1       | 2,0 | 0,00675 |
| MIR140        | 2,0 | 0,01839 |
| TMEM179       | 2,0 | 0,04392 |
| DPCR1         | 2,0 | 0,01409 |
| TSGA10IP      | 2,0 | 0,01531 |
| ARPP21        | 2,0 | 0,01283 |
| BMP5          | 2,0 | 0,00562 |
| RP11-501M7.1  | 2,0 | 0,0364  |
| IGLV10-54     | 2,0 | 0,02531 |
| ALG1L5P       | 2,1 | 0,0268  |
| CTA-313A17.2  | 2,1 | 0,02123 |
| C2CD4C        | 2,1 | 0,02703 |
| POM121B       | 2,1 | 0,00165 |
| MCCD1         | 2,1 | 0,02309 |
| CD1B          | 2,1 | 0,04425 |
| MEP1A         | 2,1 | 0,0236  |

|                |     |         |
|----------------|-----|---------|
| C2orf71        | 2,1 | 0,00302 |
| HS3ST2         | 2,1 | 0,01117 |
| RP5-1059H15.1  | 2,1 | 0,024   |
| AFF3           | 2,1 | 0,00067 |
| DPPA4          | 2,1 | 0,02751 |
| AP000648.3     | 2,1 | 0,04529 |
| IGHV4OR15-8    | 2,1 | 0,00692 |
| TSKS           | 2,1 | 0,00035 |
| CEACAMP1       | 2,1 | 0,01565 |
| IMPDH1P11      | 2,1 | 0,03443 |
| RP11-315I20.1  | 2,1 | 0,00572 |
| CCL18          | 2,1 | 0,01621 |
| PTPRR          | 2,1 | 0,0001  |
| TRAV9-2        | 2,1 | 0,00673 |
| TFF3           | 2,1 | 0,033   |
| XCL2           | 2,1 | 0,0013  |
| RP11-686D22.10 | 2,2 | 0,01763 |
| RN7SL809P      | 2,2 | 0,03122 |
| RIMBP3         | 2,2 | 0,00468 |
| REG3G          | 2,2 | 0,031   |
| XCL1           | 2,2 | 0,00146 |
| CA6            | 2,2 | 0,0138  |
| TNR            | 2,2 | 0,00461 |
| RP11-157G21.2  | 2,2 | 0,00466 |
| GNAT1          | 2,2 | 0,02403 |
| MIR381         | 2,2 | 0,01021 |
| C10orf91       | 2,2 | 0,0109  |
| TUBB3P1        | 2,2 | 0,01292 |
| SNCB           | 2,2 | 0,03332 |
| FAM27E1        | 2,2 | 0,014   |
| IGHV3-33       | 2,2 | 0,00427 |
| TRIM54         | 2,3 | 0,01808 |
| CLEC4M         | 2,3 | 0,02755 |
| LINGO2         | 2,3 | 0,00968 |
| FAM84A         | 2,3 | 0,00815 |
| PSG6           | 2,3 | 0,01908 |
| CTD-2022H16.3  | 2,3 | 0,04326 |
| PTCHD2         | 2,3 | 0,00736 |
| KCNH6          | 2,3 | 0,0376  |
| PSG1           | 2,3 | 0,00958 |
| TUBB8P11       | 2,3 | 0,04609 |
| PGPEP1L        | 2,3 | 0,00778 |
| CLEC3B         | 2,3 | 0,00137 |

|               |     |         |
|---------------|-----|---------|
| PSG7          | 2,3 | 0,02295 |
| KCNK16        | 2,3 | 0,04083 |
| CD5L          | 2,3 | 0,02176 |
| RGS7          | 2,3 | 0,00457 |
| OR2M1P        | 2,3 | 0,04328 |
| DLGAP2        | 2,3 | 0,00142 |
| ITLN2         | 2,3 | 0,03074 |
| PSG11         | 2,3 | 0,0186  |
| GSTA2         | 2,4 | 0,02537 |
| COL9A1        | 2,4 | 0,00774 |
| RP11-680F20.5 | 2,4 | 0,00149 |
| MUC15         | 2,4 | 0,01604 |
| CHAT          | 2,4 | 0,04227 |
| MIR151B       | 2,4 | 0,00646 |
| CNGA3         | 2,4 | 0,03571 |
| RIMBP3B       | 2,4 | 0,01983 |
| SLCO1B1       | 2,4 | 0,0243  |
| LHX2          | 2,4 | 0,04296 |
| MIR654        | 2,4 | 0,00522 |
| KRT36         | 2,4 | 0,02842 |
| SLC30A10      | 2,4 | 0,02719 |
| GML           | 2,5 | 0,03623 |
| RP13-492C18.2 | 2,5 | 0,00721 |
| NXPH4         | 2,5 | 0,00429 |
| GTSF1         | 2,5 | 0,00169 |
| KRTAP10-8     | 2,5 | 0,03307 |
| TRBV4-1       | 2,5 | 0,00883 |
| TUBB2BP1      | 2,5 | 0,00113 |
| TUBB2B        | 2,5 | 0,00061 |
| GLRA3         | 2,5 | 0,01612 |
| CUBNP3        | 2,5 | 0,04829 |
| RP11-419M24.6 | 2,5 | 0,01479 |
| TRDV1         | 2,6 | 0,00585 |
| CHST8         | 2,6 | 0,04736 |
| QRSLIP1       | 2,6 | 0,00562 |
| OR2M3         | 2,6 | 0,00164 |
| RP11-318K12.1 | 2,6 | 0,01221 |
| PSG2          | 2,6 | 0,03937 |
| CPA5          | 2,6 | 0,00156 |
| OR52I2        | 2,6 | 0,00941 |
| CST1          | 2,6 | 0,00485 |
| PSG3          | 2,6 | 0,01247 |
| DMRT2         | 2,6 | 0,00232 |

|               |     |         |
|---------------|-----|---------|
| ZFP42         | 2,6 | 0,0103  |
| BEND4         | 2,6 | 0,00187 |
| CTD-2002J20.1 | 2,6 | 0,02551 |
| KRT8P13       | 2,7 | 0,00235 |
| MMP27         | 2,7 | 0,04334 |
| OTOG          | 2,7 | 0,01639 |
| ACTC1         | 2,7 | 0,00394 |
| FAM138F       | 2,7 | 0,0271  |
| SORCS3        | 2,7 | 0,00178 |
| NKAIN3        | 2,7 | 0,00449 |
| RPSAP63       | 2,7 | 0,03648 |
| IRX1          | 2,7 | 0,01472 |
| IPLL3P        | 2,7 | 0,04363 |
| DCSTAMP       | 2,8 | 0,00086 |
| RP11-661O13.1 | 2,8 | 0,01909 |
| MS4A6E        | 2,8 | 0,01884 |
| RP13-395E19.2 | 2,8 | 0,01894 |
| IGHD          | 2,8 | 0,00038 |
| PSG4          | 2,8 | 0,02016 |
| PSMC1P3       | 2,8 | 0,03831 |
| GRP           | 2,8 | 0,01823 |
| OR4N2         | 2,9 | 0,01243 |
| AKR1D1        | 2,9 | 0,01772 |
| C4orf22       | 2,9 | 0,00677 |
| PTPN20CP      | 2,9 | 0,00278 |
| PSG9          | 2,9 | 0,00512 |
| TRAV40        | 2,9 | 0,01054 |
| RP11-550F7.1  | 2,9 | 0,00196 |
| PGK2          | 2,9 | 0,01194 |
| MIR411        | 2,9 | 0,00071 |
| IQCJ          | 2,9 | 0,00363 |
| TTR           | 2,9 | 0,00322 |
| GATA4         | 2,9 | 0,00311 |
| CCDC58P3      | 3,0 | 0,01668 |
| KRTAP10-9     | 3,0 | 0,00301 |
| IL2           | 3,0 | 0,00267 |
| KRTAP10-3     | 3,0 | 0,00863 |
| FOXD3         | 3,0 | 0,02091 |
| PAX9          | 3,0 | 0,00936 |
| FAM163A       | 3,0 | 0,01839 |
| TRAV1-2       | 3,1 | 0,00076 |
| CTD-2330J20.2 | 3,1 | 0,00752 |
| KCTD9P2       | 3,1 | 0,00801 |



|             |     |         |
|-------------|-----|---------|
| IGKV1-33    | 3,1 | 0,02826 |
| FAM47C      | 3,1 | 0,02988 |
| BRINP1      | 3,2 | 0,0004  |
| HNF1B       | 3,2 | 0,02427 |
| PLCZ1       | 3,2 | 0,00118 |
| HBG2        | 3,2 | 0,01722 |
| ITLN1       | 3,2 | 0,00834 |
| IGHV1-58    | 3,2 | 0,00069 |
| ADCY8       | 3,3 | 0,00118 |
| UGT1A10     | 3,3 | 0,03758 |
| FOLR4       | 3,4 | 0,00076 |
| SNORD115-14 | 3,4 | 0,02053 |
| DCX         | 3,4 | 0,00237 |
| NXPH1       | 3,5 | 0,00917 |
| HCRTR2      | 3,5 | 0,00297 |
| KRTAP10-6   | 3,5 | 0,00338 |
| MIR7-3HG    | 3,7 | 0,01654 |
| IGLV1-36    | 3,7 | 7,4E-05 |
| UGT1A11P    | 3,8 | 0,01514 |
| MYL1        | 3,8 | 0,03536 |
| UGT1A12P    | 3,9 | 0,00295 |
| FAM25C      | 3,9 | 0,00867 |
| USP17L10    | 4,0 | 0,01378 |
| CHIT1       | 4,2 | 1,8E-06 |
| UGT1A8      | 4,4 | 0,0116  |
| DSCR4       | 4,5 | 0,045   |
| CGB2        | 4,6 | 0,01336 |
| MYOD1       | 4,8 | 0,01007 |
| GAB4        | 5,0 | 0,00799 |
| HBG1        | 5,5 | 0,00233 |
| HOXD13      | 5,7 | 0,00339 |

**Supplemental Table 4. Genes differentially represented in M-TME of M2<sup>Lo</sup> vs M2<sup>Hi</sup> HGSC samples.**

| Overall survival         |                     |             |
|--------------------------|---------------------|-------------|
| Variable                 | HR (95% CI)         | p-value     |
| <b>CD8 T cells</b>       | 0.47 (0.2-1.1)      | 0.09        |
| <b>MDSC</b>              | 0.58 (0.29-1.2)     | 0.12        |
| <b>Treg</b>              | 0.5 (0.23-1.1)      | 0.09        |
| <b>Endothelium cells</b> | 0.81 (0.38-1.7)     | 0.59        |
| <b>CAFs</b>              | 0.92 (0.56-1.5)     | 0.75        |
| <b>TGFB1</b>             | 0.43 (0.051-3.6)    | 0.43        |
| <b>M2-like TAMs</b>      | 56.85 (1.41-2291.5) | <b>0.03</b> |

**Supplemental table 5. Univariate COX proportional hazard analyses of Gene ontology (immunosuppression processes) enrichment signatures in M-TME.**
